# Supplementary material for: Lysosomal Protease-Mediated APP Degradation is pH-Dependent, Mutation-Sensitive, and Facilitates Tau Proteolysis
Source: Research Square preprint supplement (doi:10.21203/rs.3.rs-6978813/v1), 2025-07-10
Supplement: Supplementary file 1 [file ba28d1ae87a31e8731dfe7ba.pdf]

Figure S1

A. Undifferentiated SH-SY5Y cells

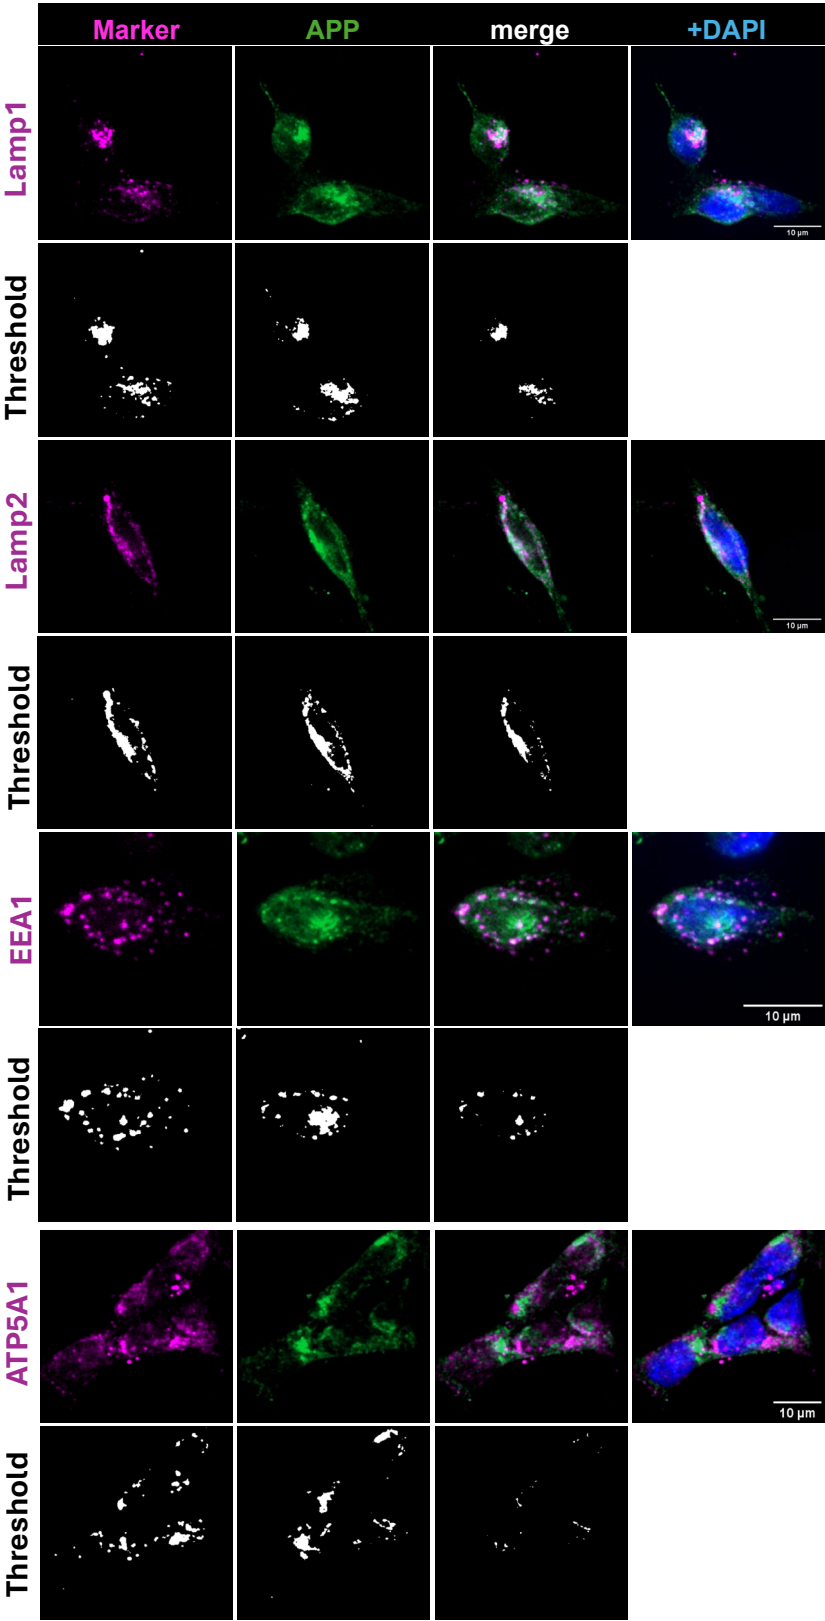

# Figure S1

## B. Example colocalization analysis

| Organelle Marker | Area ( $\mu\text{m}^2$ ) |        |         | % APP colocalized with Marker (Overlap / APP) |
|------------------|--------------------------|--------|---------|-----------------------------------------------|
|                  | Marker                   | APP    | Overlap |                                               |
| Lamp1            | 32.883                   | 32.954 | 17.254  | 52.4%                                         |
| Lamp2            | 31.565                   | 32.724 | 19.27   | 58.9%                                         |
| EEA1             | 12.156                   | 12.345 | 3.313   | 26.8%                                         |
| ATP5A1           | 33.695                   | 34.954 | 3.125   | 8.9%                                          |

**Figure S1.** Colocalization analysis, undifferentiated SH-SY5Y neuroblastoma cells.

**(A)** Undifferentiated SH-SY5Y cells were fixed and immunostained with antibodies against organelle markers (magenta) and APP (green). Lamp1 and Lamp2, EEA1, and ATP5A1 are enriched in lysosomes, early endosomes, and mitochondria, respectively. Scale bar = 10  $\mu\text{m}$ . For each cell, a threshold of the brightest 2% of pixels was set to create a binary mask of APP and organelle intensity. The resulting areas were then compared to find areas of overlap. **(B)** Each area was measured in  $\mu\text{m}^2$ , and the percentage of APP localized to the organelle in question was calculated by dividing APP area by overlap area. Example calculations are provided above, with the caveat that each cell was calculated individually and not as clusters.



## Figure S2

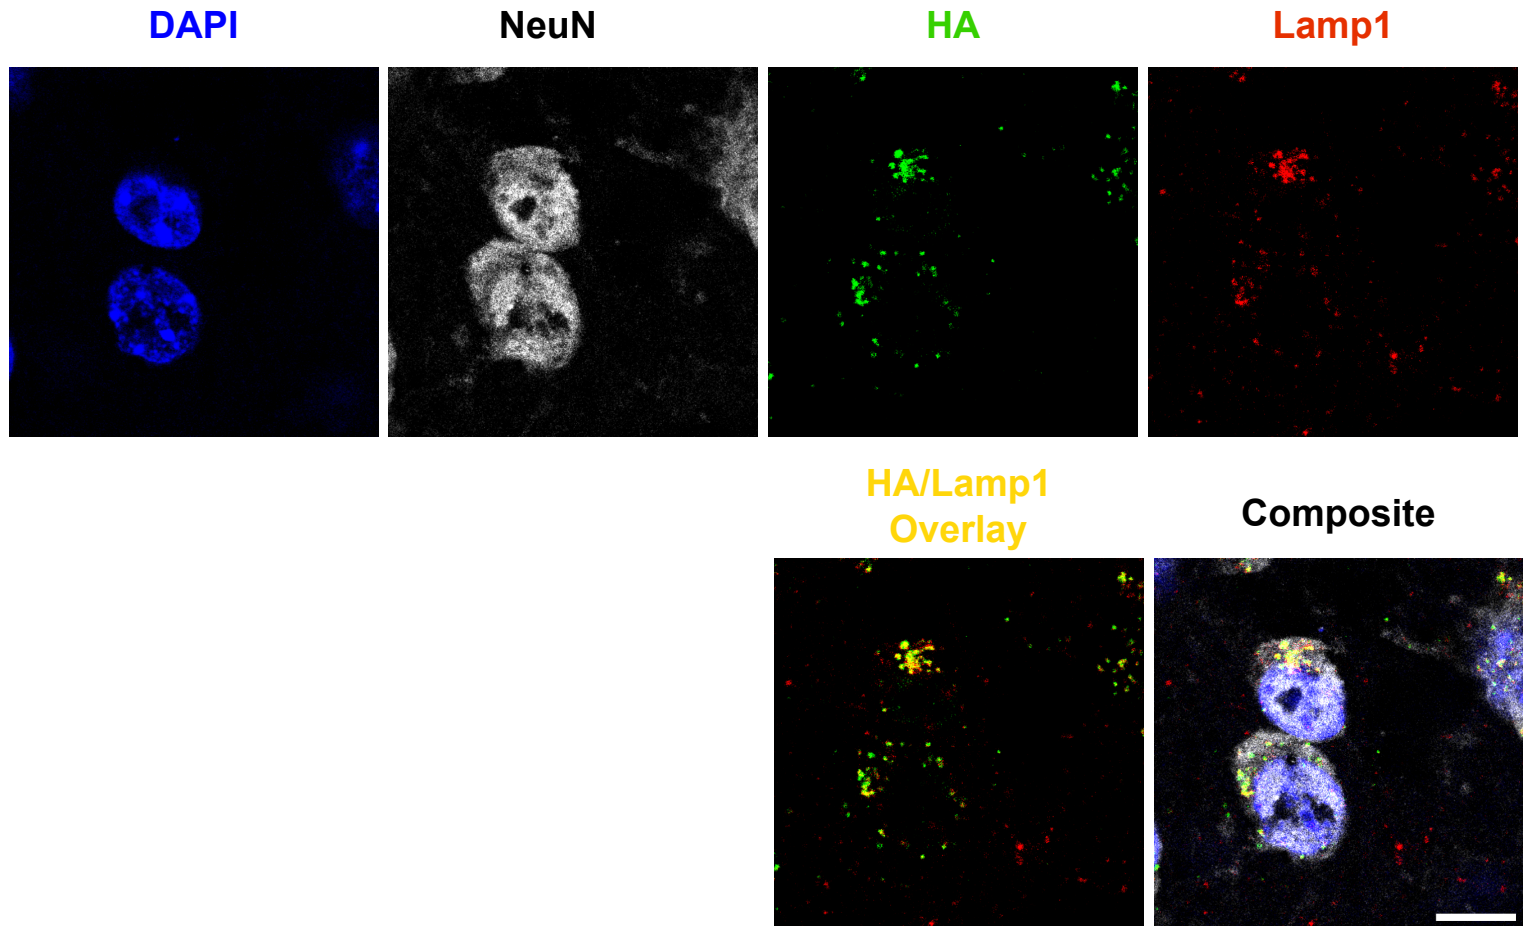

**Figure S2.** Validation of a neuron-specific LysoTag mouse model. To generate a neuron-specific LysoTag mouse line, mice expressing TMEM192 fused to a 3X HA tag following a loxP STOP cassette were crossed with Syn1-Cre mice. Neuronal lysosome-specific HA expression in heterozygous mice was confirmed via immunohistochemistry and confocal microscopy. Scale bar = 10  $\mu$ m.

Figure S4

Cathepsin A cleaves APP

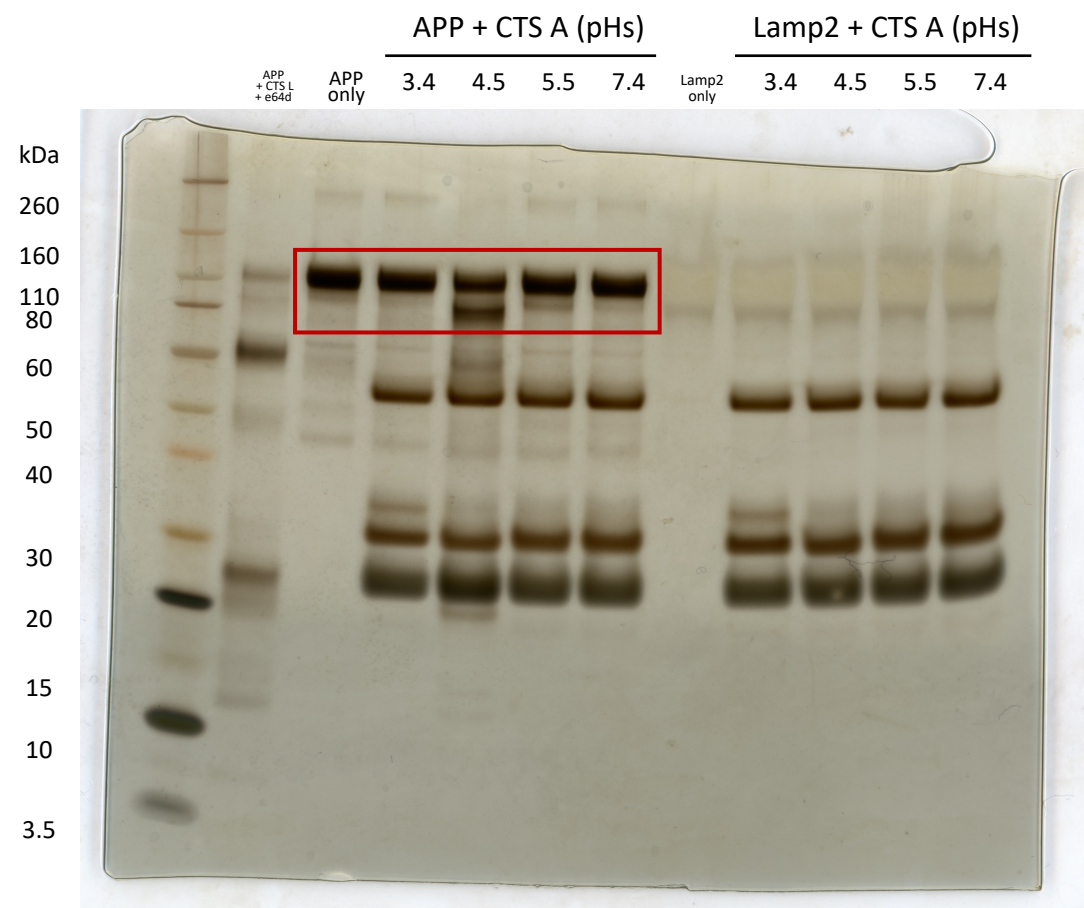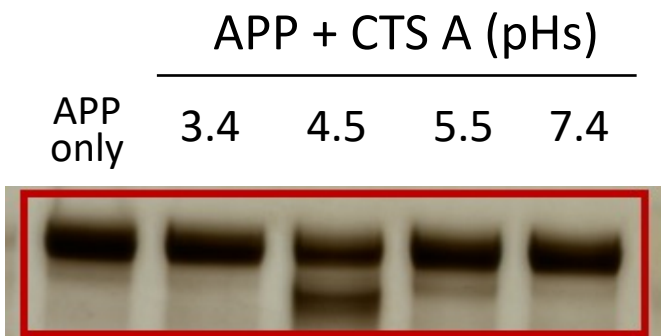

APP: 77 kDa  
CTS A: 53 kDa  
Lamp2: 110 kDa

Enzymes (1 uM) plus substrate (1ug)  
incubated at 37C for 1 hour.  
Samples run on 4-12% Bis-Tris Gels with  
MES Buffer and Silver Stained.

## Cathepsin B cleaves APP

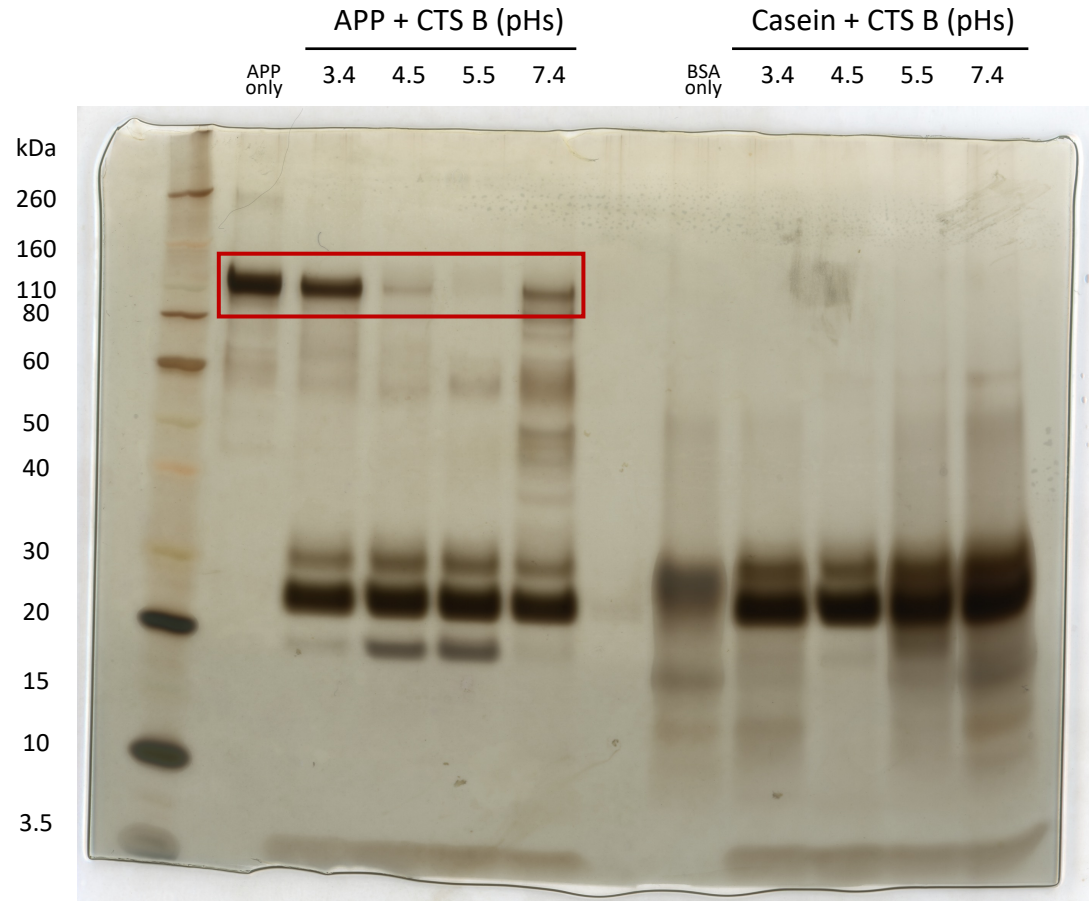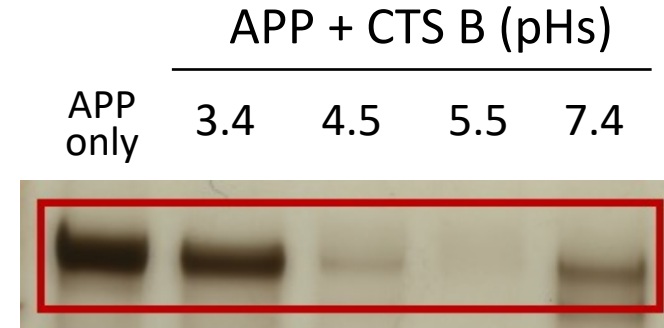

APP: 77 kDa  
CTS B: 27.5 kDa  
Casein: 24 kDa

Enzymes (1 uM) plus substrate (1ug)  
incubated at 37C for 1 hour.  
Samples run on 4-12% Bis-Tris Gels with  
MES Buffer and Silver Stained.

# Cathepsin C cleaves APP

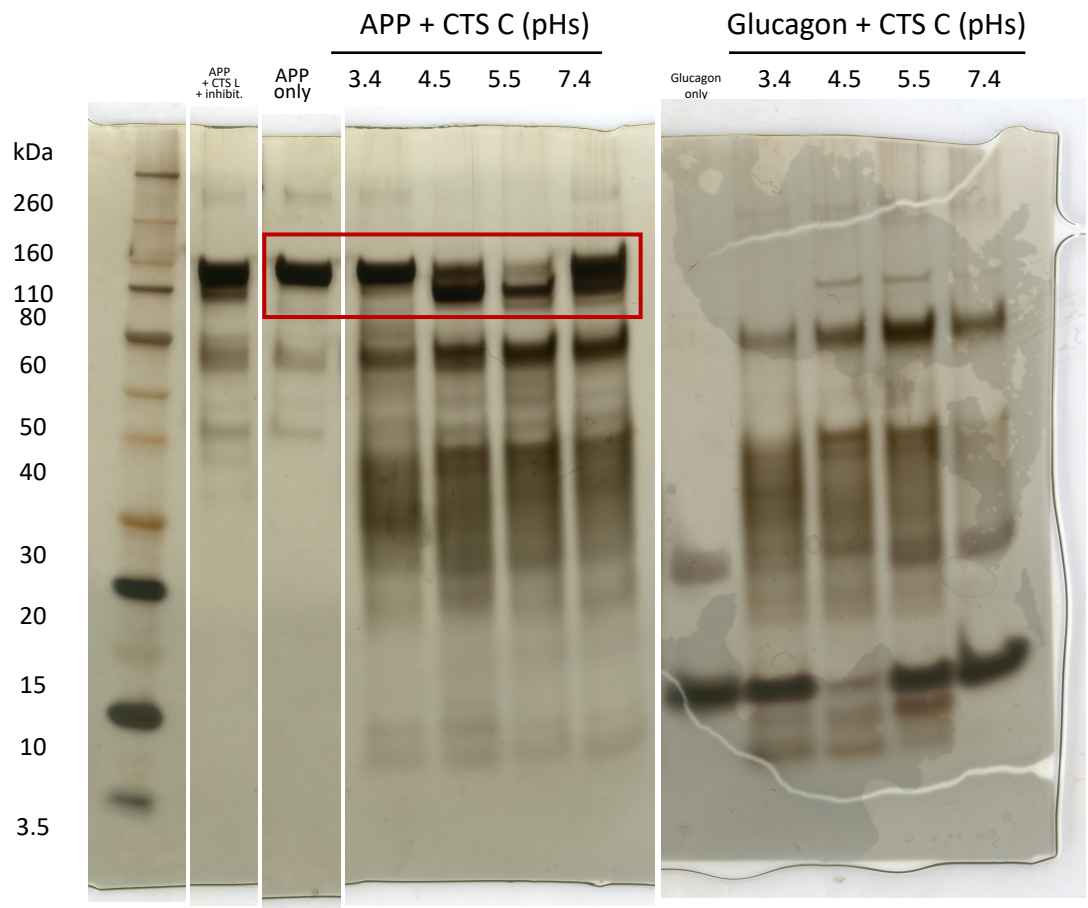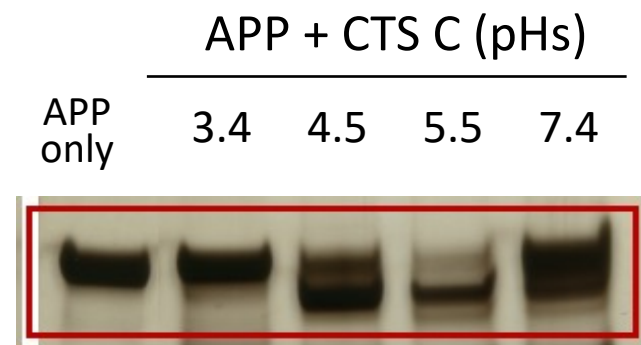

APP: 77 kDa  
 CTS C: 51 kDa  
 Glucagon: 13 kDa

Enzymes (1 uM) plus substrate (1ug)  
 incubated at 37C for 1 hour.  
 Samples run on 4-12% Bis-Tris Gels with  
 MES Buffer and Silver Stained.



## Cathepsin D cleaves APP

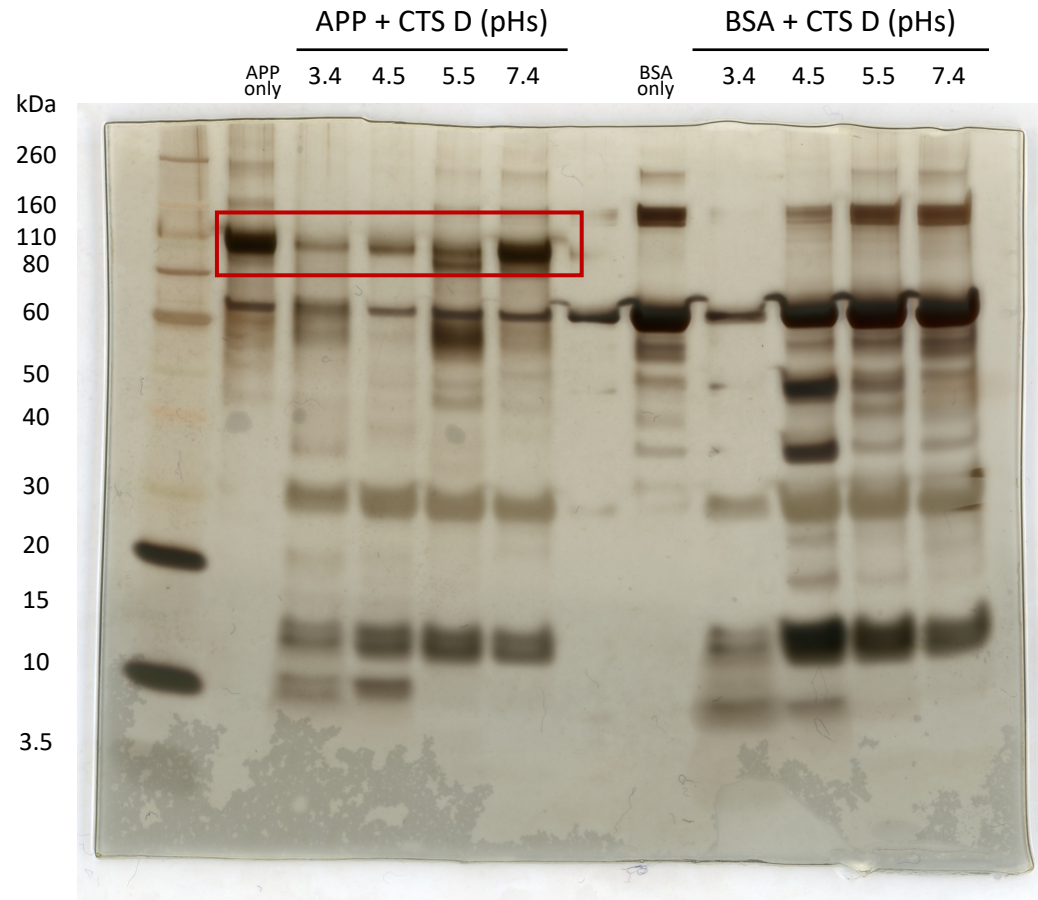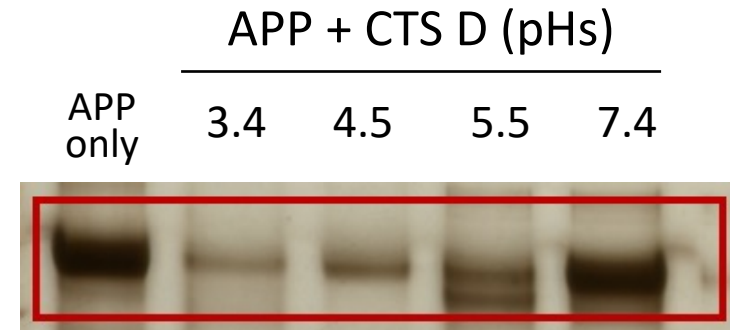

APP: 77 kDa  
CTS D: 42 kDa  
BSA: 68 kDa

Enzymes (1 uM) plus substrate (1ug)  
incubated at 37C for 1 hour.  
Samples run on 4-12% Bis-Tris Gels with  
MES Buffer and Silver Stained.

# Cathepsin E cleaves APP

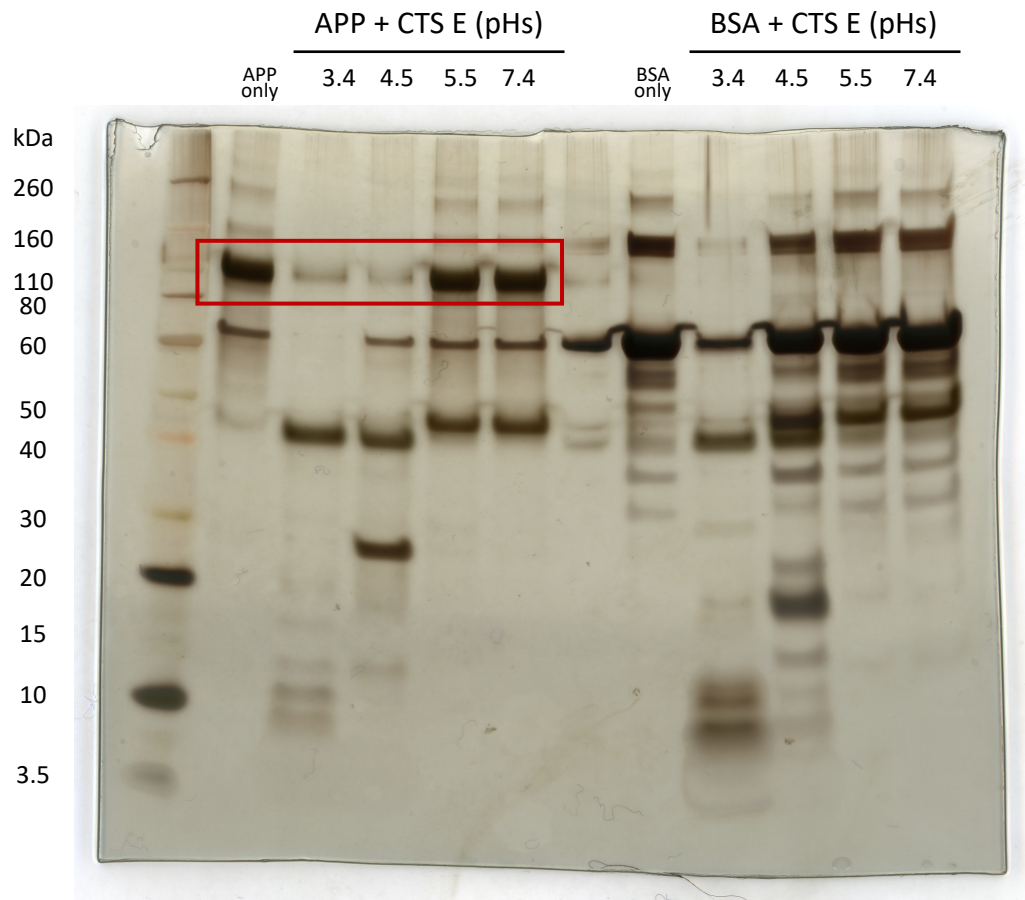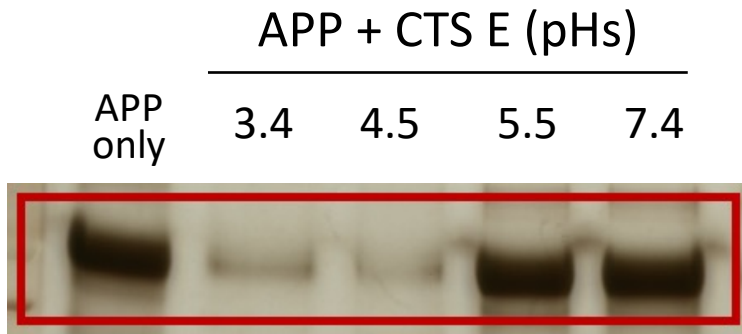

APP: 77 kDa  
CTS E: 42 kDa  
BSA: 68 kDa

Enzymes (1 uM) plus substrate (1ug)  
incubated at 37C for 1 hour.  
Samples run on 4-12% Bis-Tris Gels with  
MES Buffer and Silver Stained.

## Cathepsin F does not cleave APP

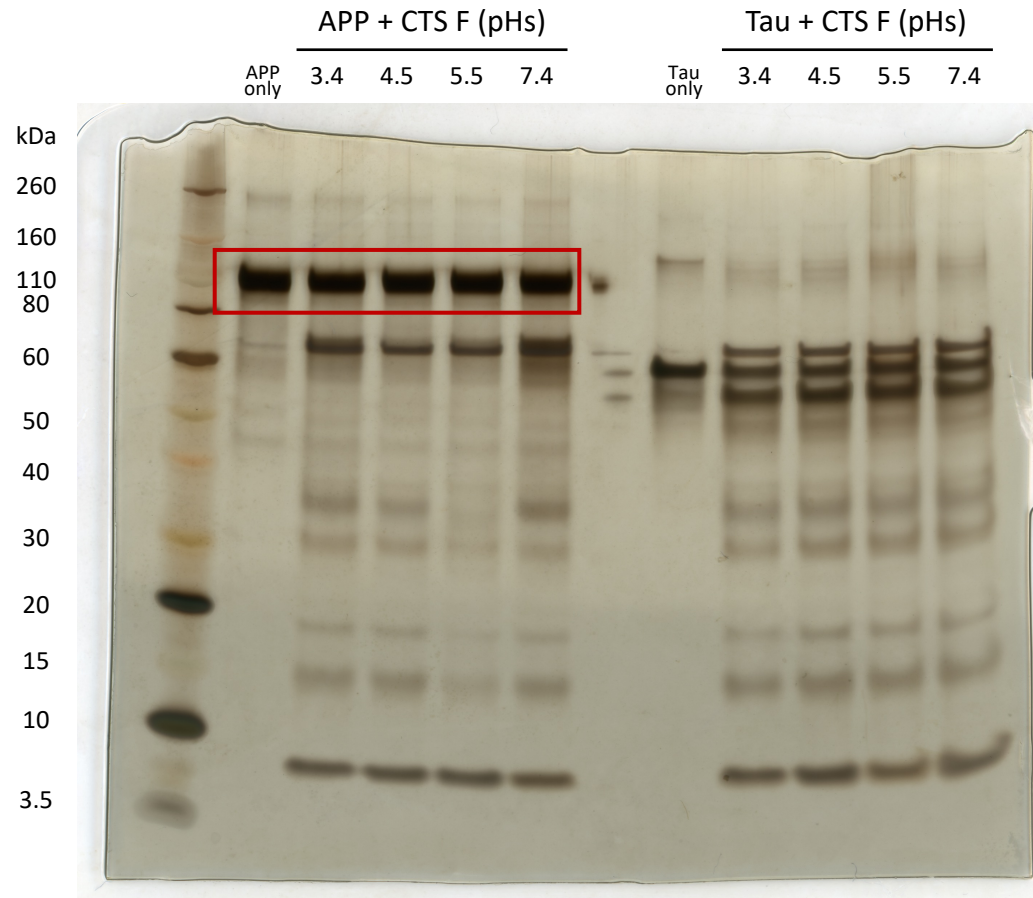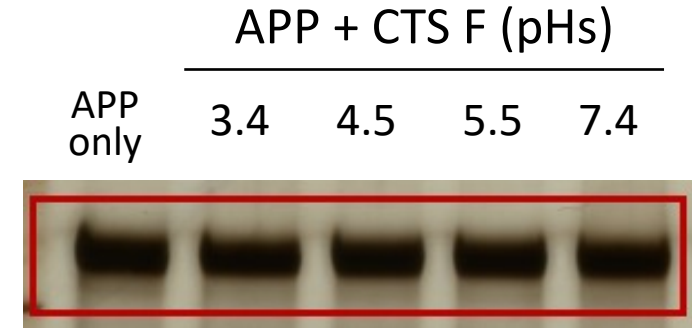

APP: 77 kDa

CTS F: 39 kDa

Tau:

Enzymes (1 uM) plus substrate (1ug)  
incubated at 37C for 1 hour.

Samples run on 4-12% Bis-Tris Gels with  
MES Buffer and Silver Stained.

# Cathepsin G cleaves APP

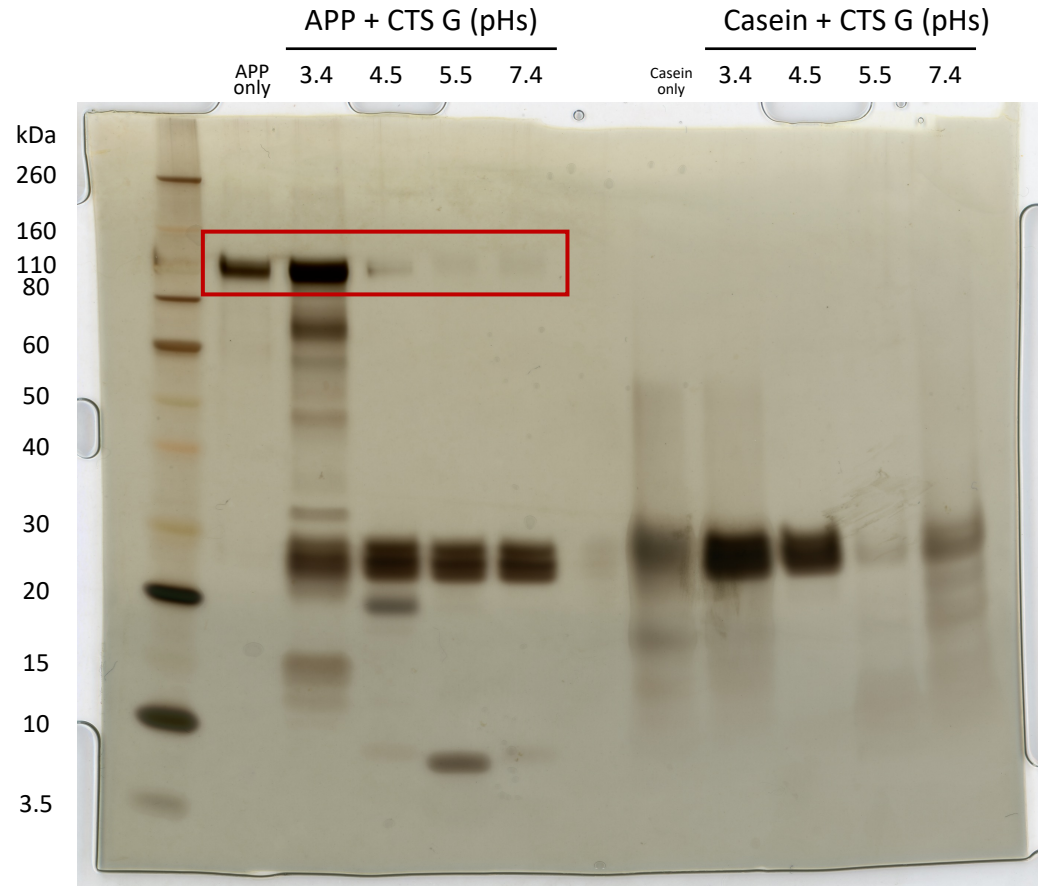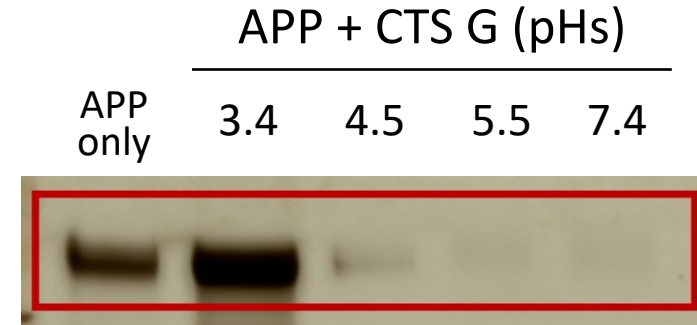

APP: 77 kDa  
CTS G: 23.5 kDa  
Casein: 24 kDa

Enzymes (1 uM) plus substrate (1ug)  
incubated at 37C for 1 hour.  
Samples run on 4-12% Bis-Tris Gels with  
MES Buffer and Silver Stained.



# Cathepsin H cleaves APP

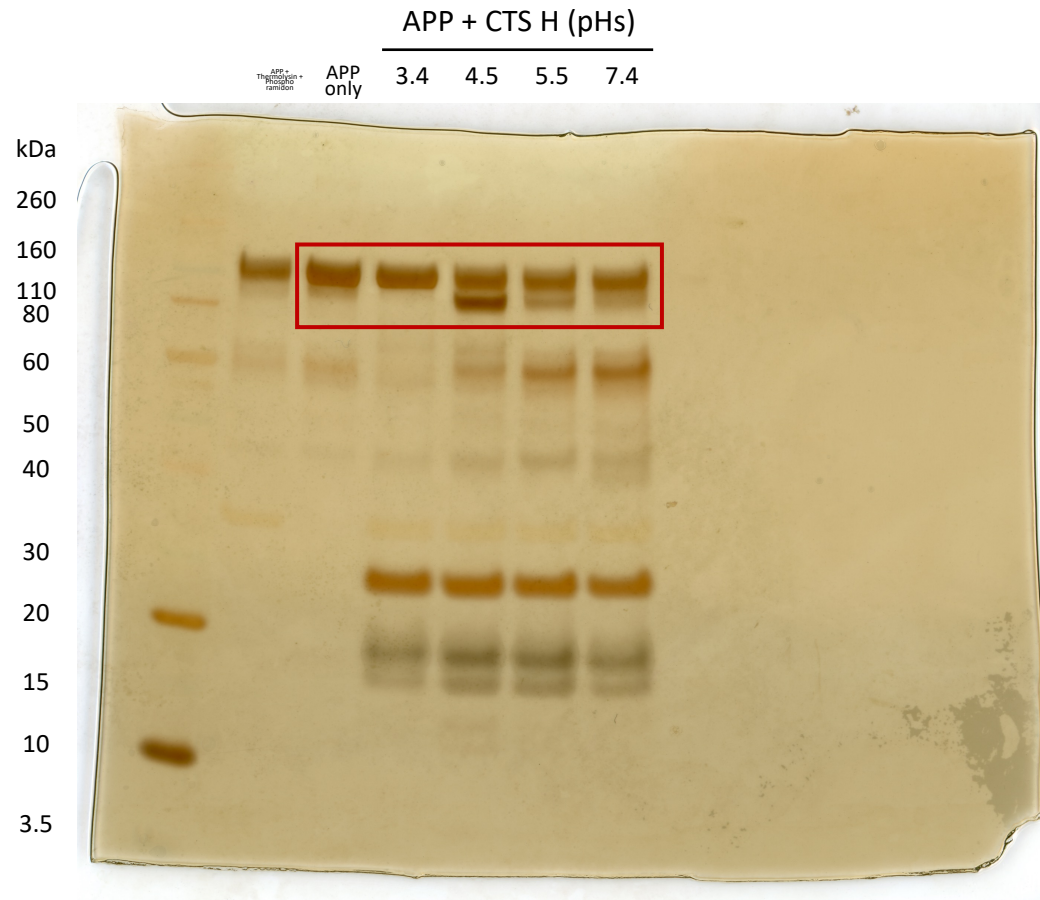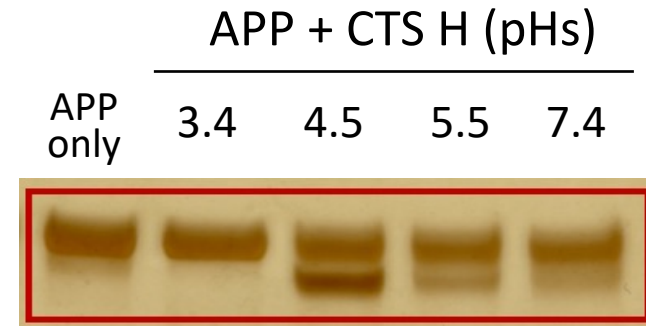

APP: 77 kDa  
CTS H: 37 kDa

Enzymes (1 uM) plus substrate (1ug)  
incubated at 37C for 1 hour.  
Samples run on 4-12% Bis-Tris Gels with  
MES Buffer and Silver Stained.

# Cathepsin K cleaves APP

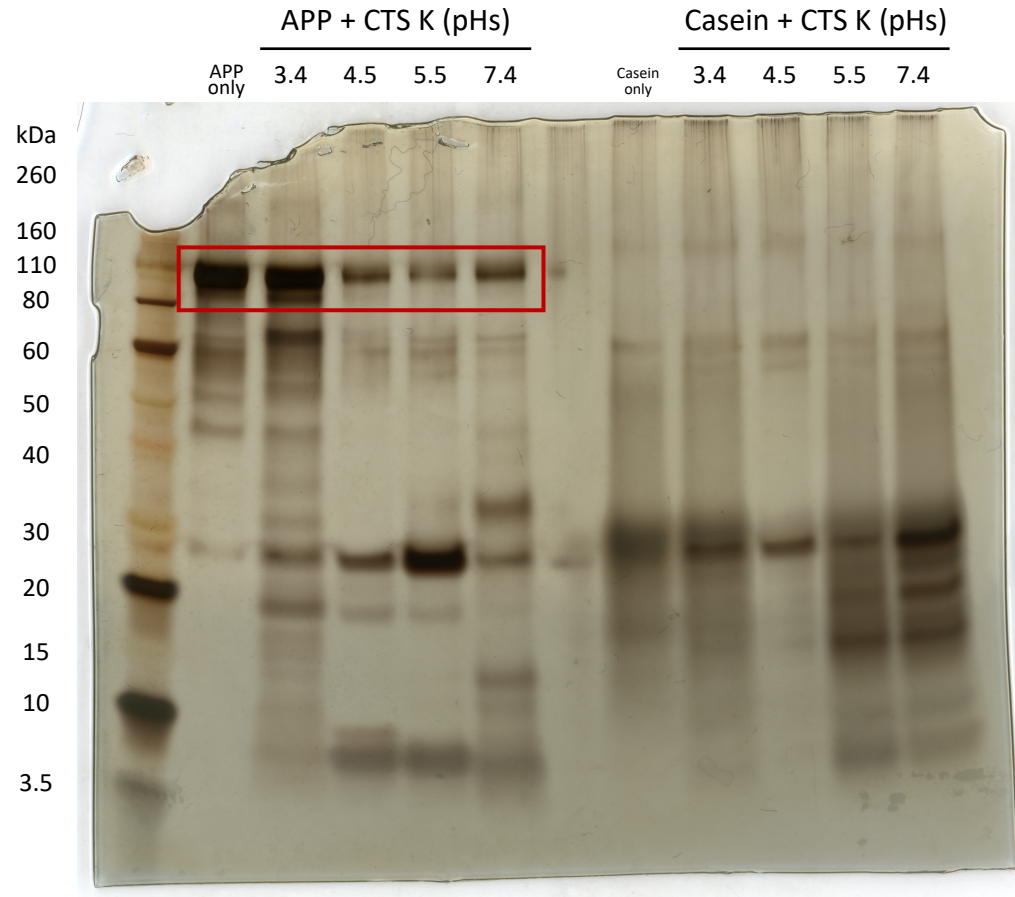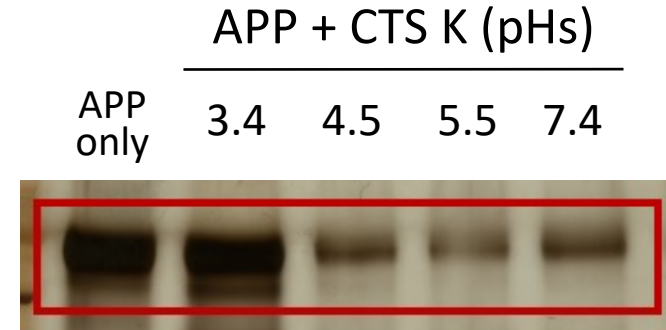

APP: 77 kDa  
CTS K: 27 kDa  
Casein: 24 kDa

Enzymes (1 uM) plus substrate (1ug)  
incubated at 37C for 1 hour.  
Samples run on 4-12% Bis-Tris Gels with  
MES Buffer and Silver Stained.

# Cathepsin L cleaves APP

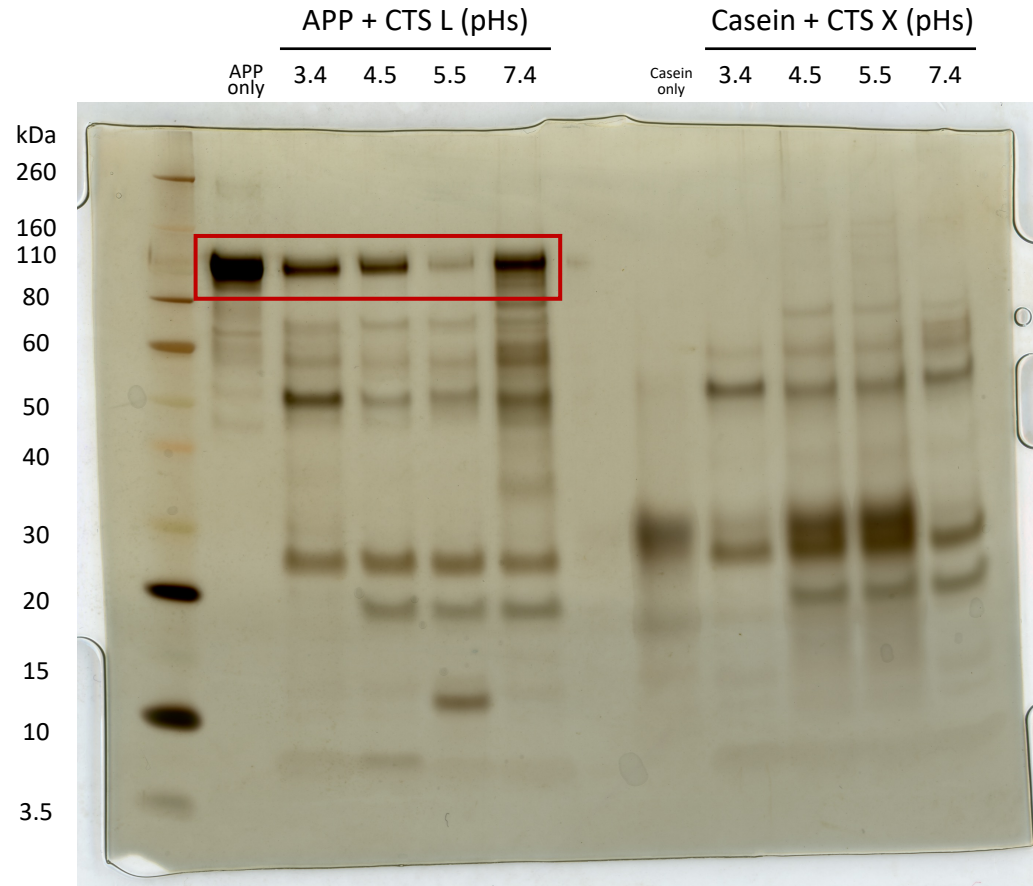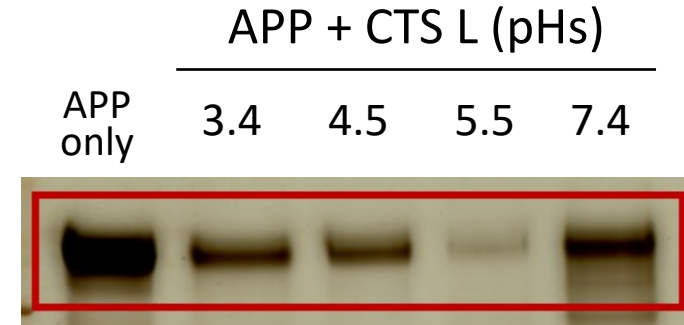

APP: 77 kDa  
CTS L: 29 kDa  
Casein: 24 kDa

Enzymes (1 uM) plus substrate (1ug)  
incubated at 37C for 1 hour.  
Samples run on 4-12% Bis-Tris Gels with  
MES Buffer and Silver Stained.

## Cathepsin O does not cleave APP

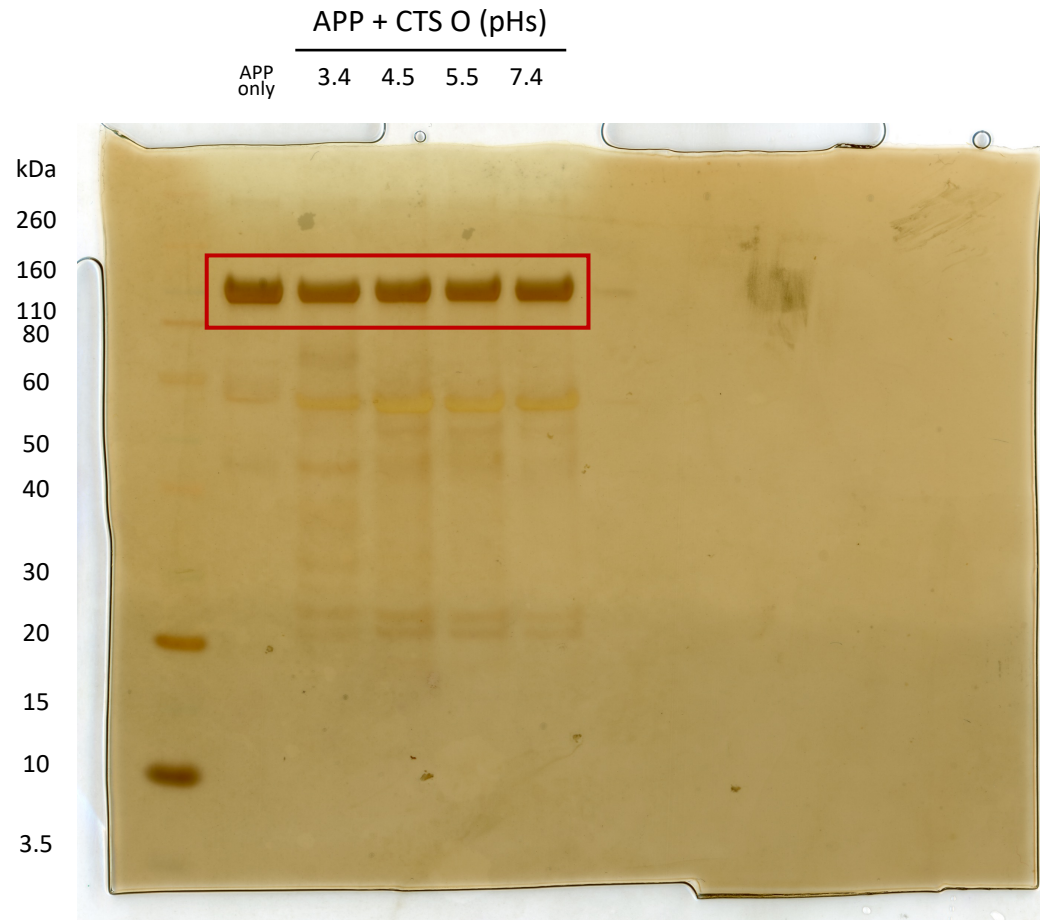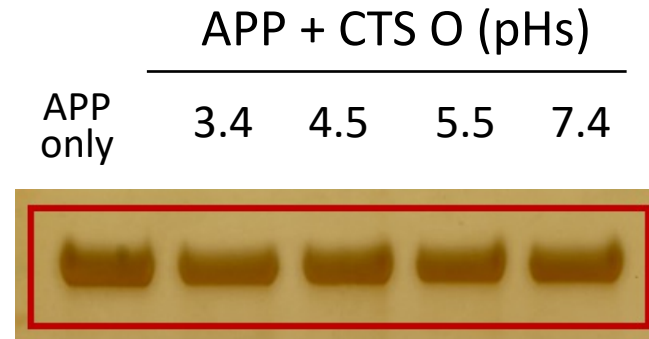

APP: 77 kDa  
CTS O: 33 kDa

Enzymes (1 uM) plus substrate (1ug)  
incubated at 37C for 1 hour.  
Samples run on 4-12% Bis-Tris Gels with  
MES Buffer and Silver Stained.



# Cathepsin S cleaves APP

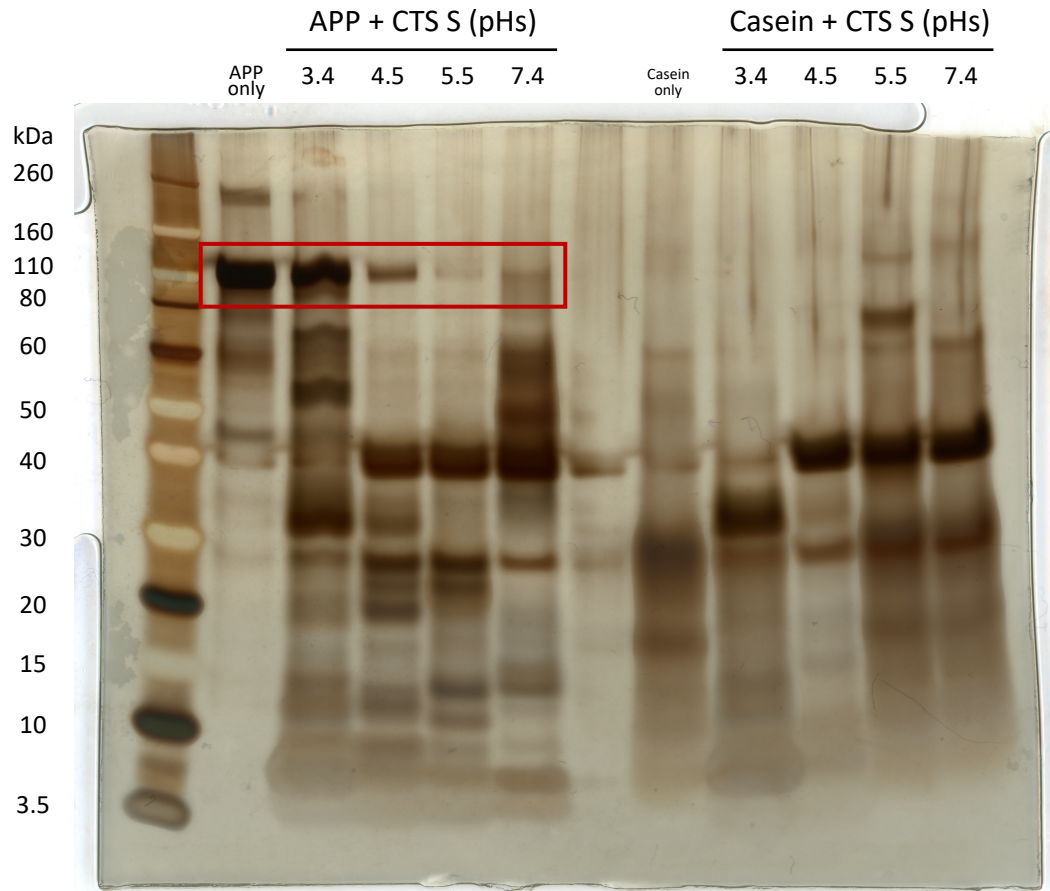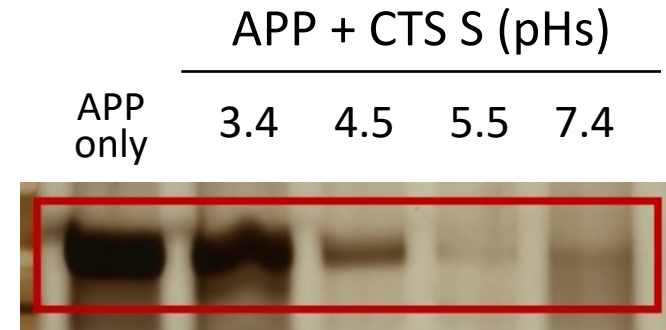

APP: 77 kDa  
CTS S: 39 kDa  
Casein: 24 kDa

Enzymes (1 uM) plus substrate (1ug)  
incubated at 37C for 1 hour.  
Samples run on 4-12% Bis-Tris Gels with  
MES Buffer and Silver Stained.

## Cathepsin V cleaves APP

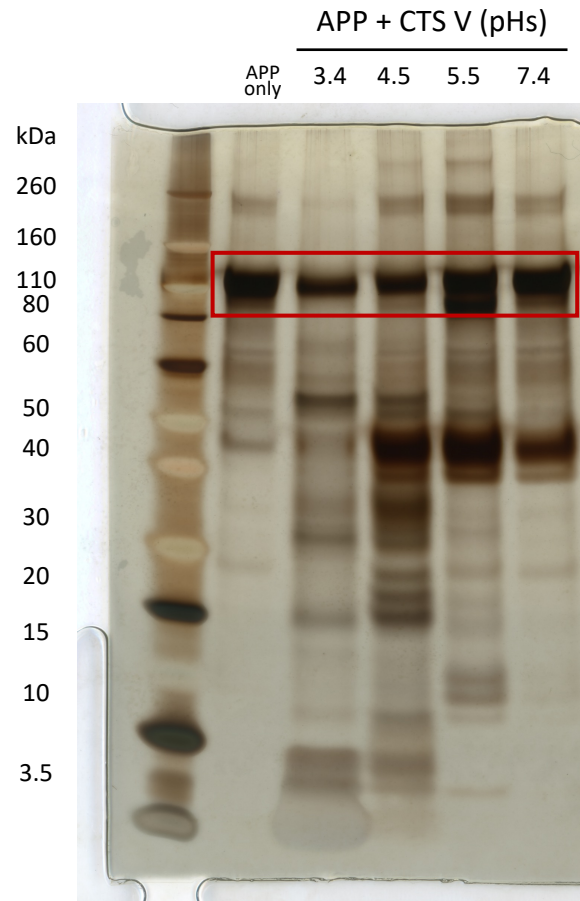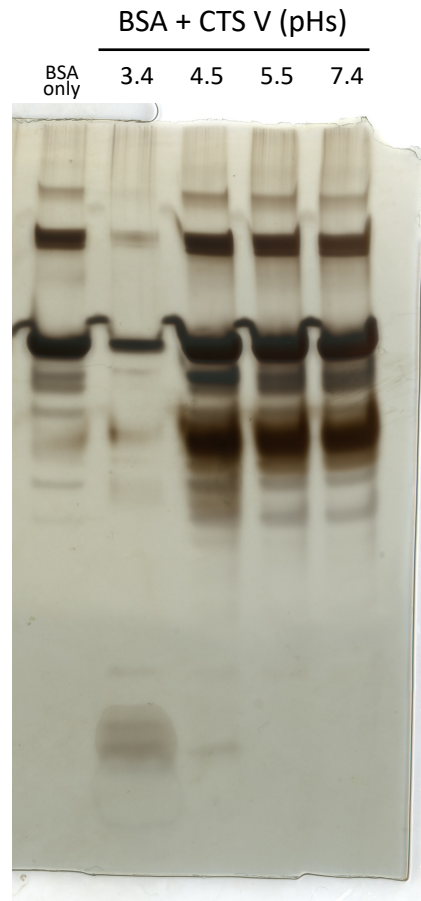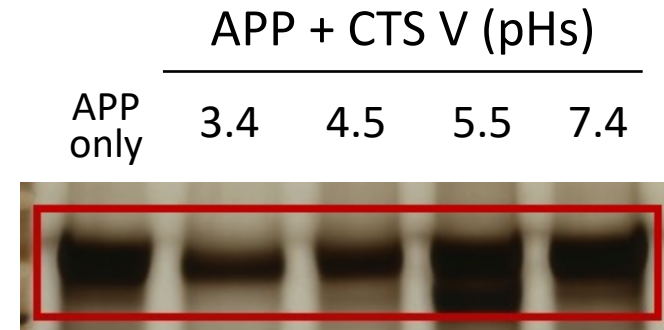

APP: 77 kDa  
CTS V: 37 kDa  
BSA: 68 kDa

Enzymes (1 uM) plus substrate (1ug)  
incubated at 37C for 1 hour.  
Samples run on 4-12% Bis-Tris Gels with  
MES Buffer and Silver Stained.

## Cathepsin X does not cleave APP

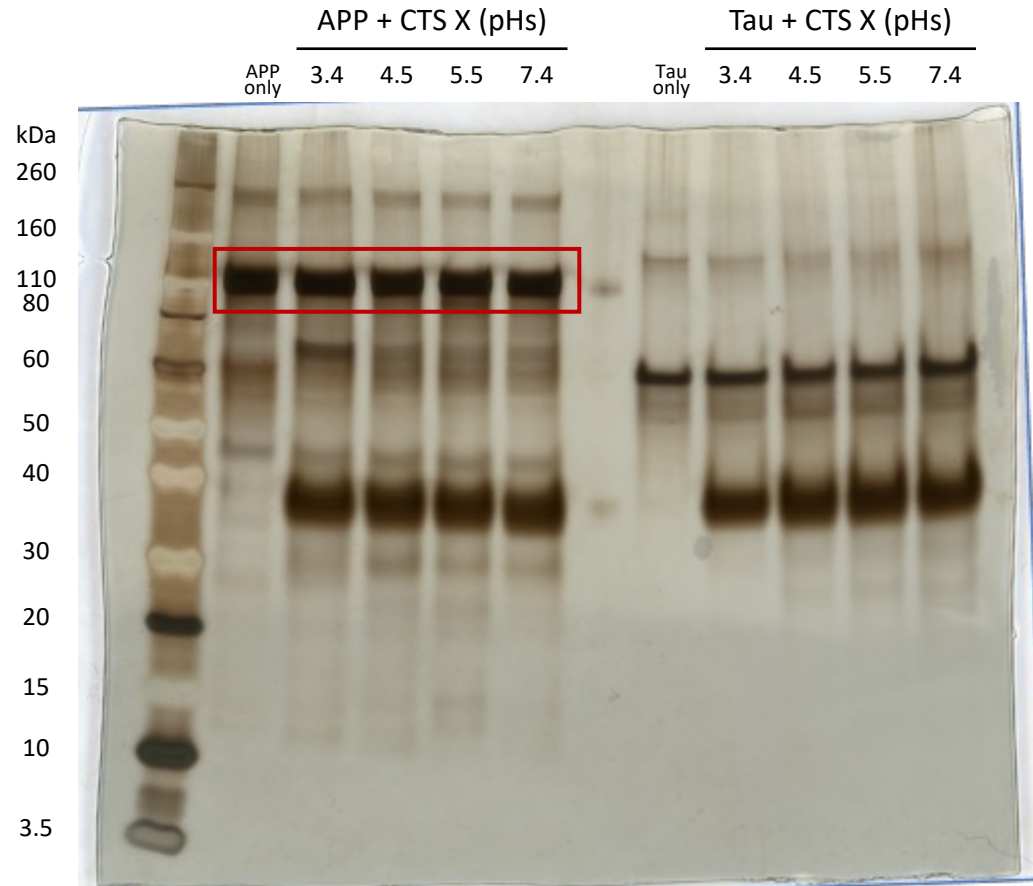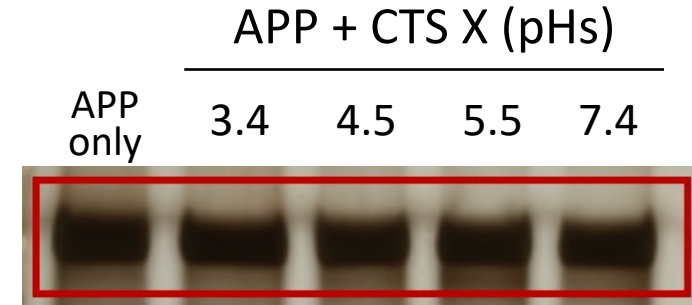

APP: 77 kDa  
CTS X: 33 kDa  
Tau:

Enzymes (1 uM) plus substrate (1ug)  
incubated at 37C for 1 hour.  
Samples run on 4-12% Bis-Tris Gels with  
MES Buffer and Silver Stained.

## Legumain/AEP cleaves APP

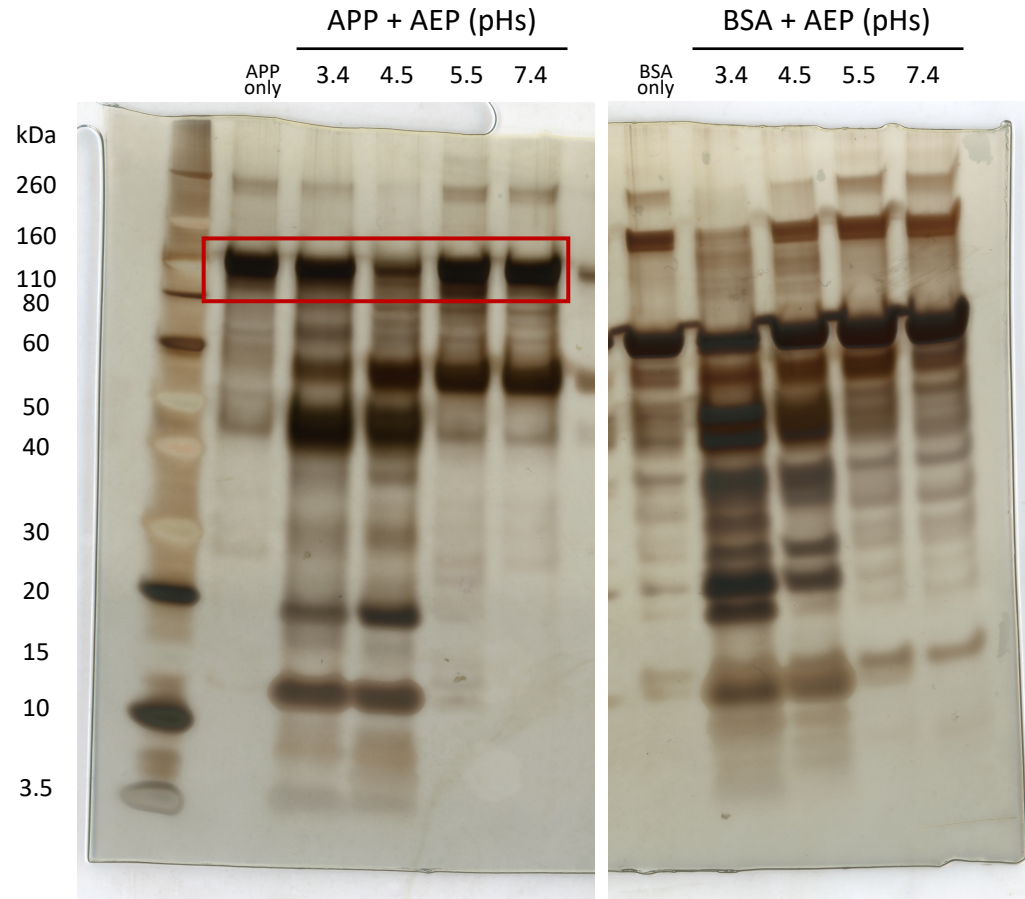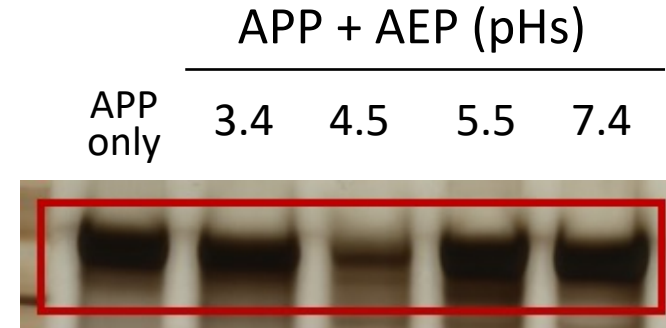

APP: 77 kDa

AEP: 49 kDa

BSA: 68 kDa

Enzymes (1 uM) plus substrate (1ug)  
incubated at 37C for 1 hour.

Samples run on 4-12% Bis-Tris Gels with  
MES Buffer and Silver Stained.



**Figure S4.** Full silver-stained gels demonstrating cathepsin cleavage of sAPP at varying pH values.

Full silver-stained gels from Figure 1E.

# Figure S3

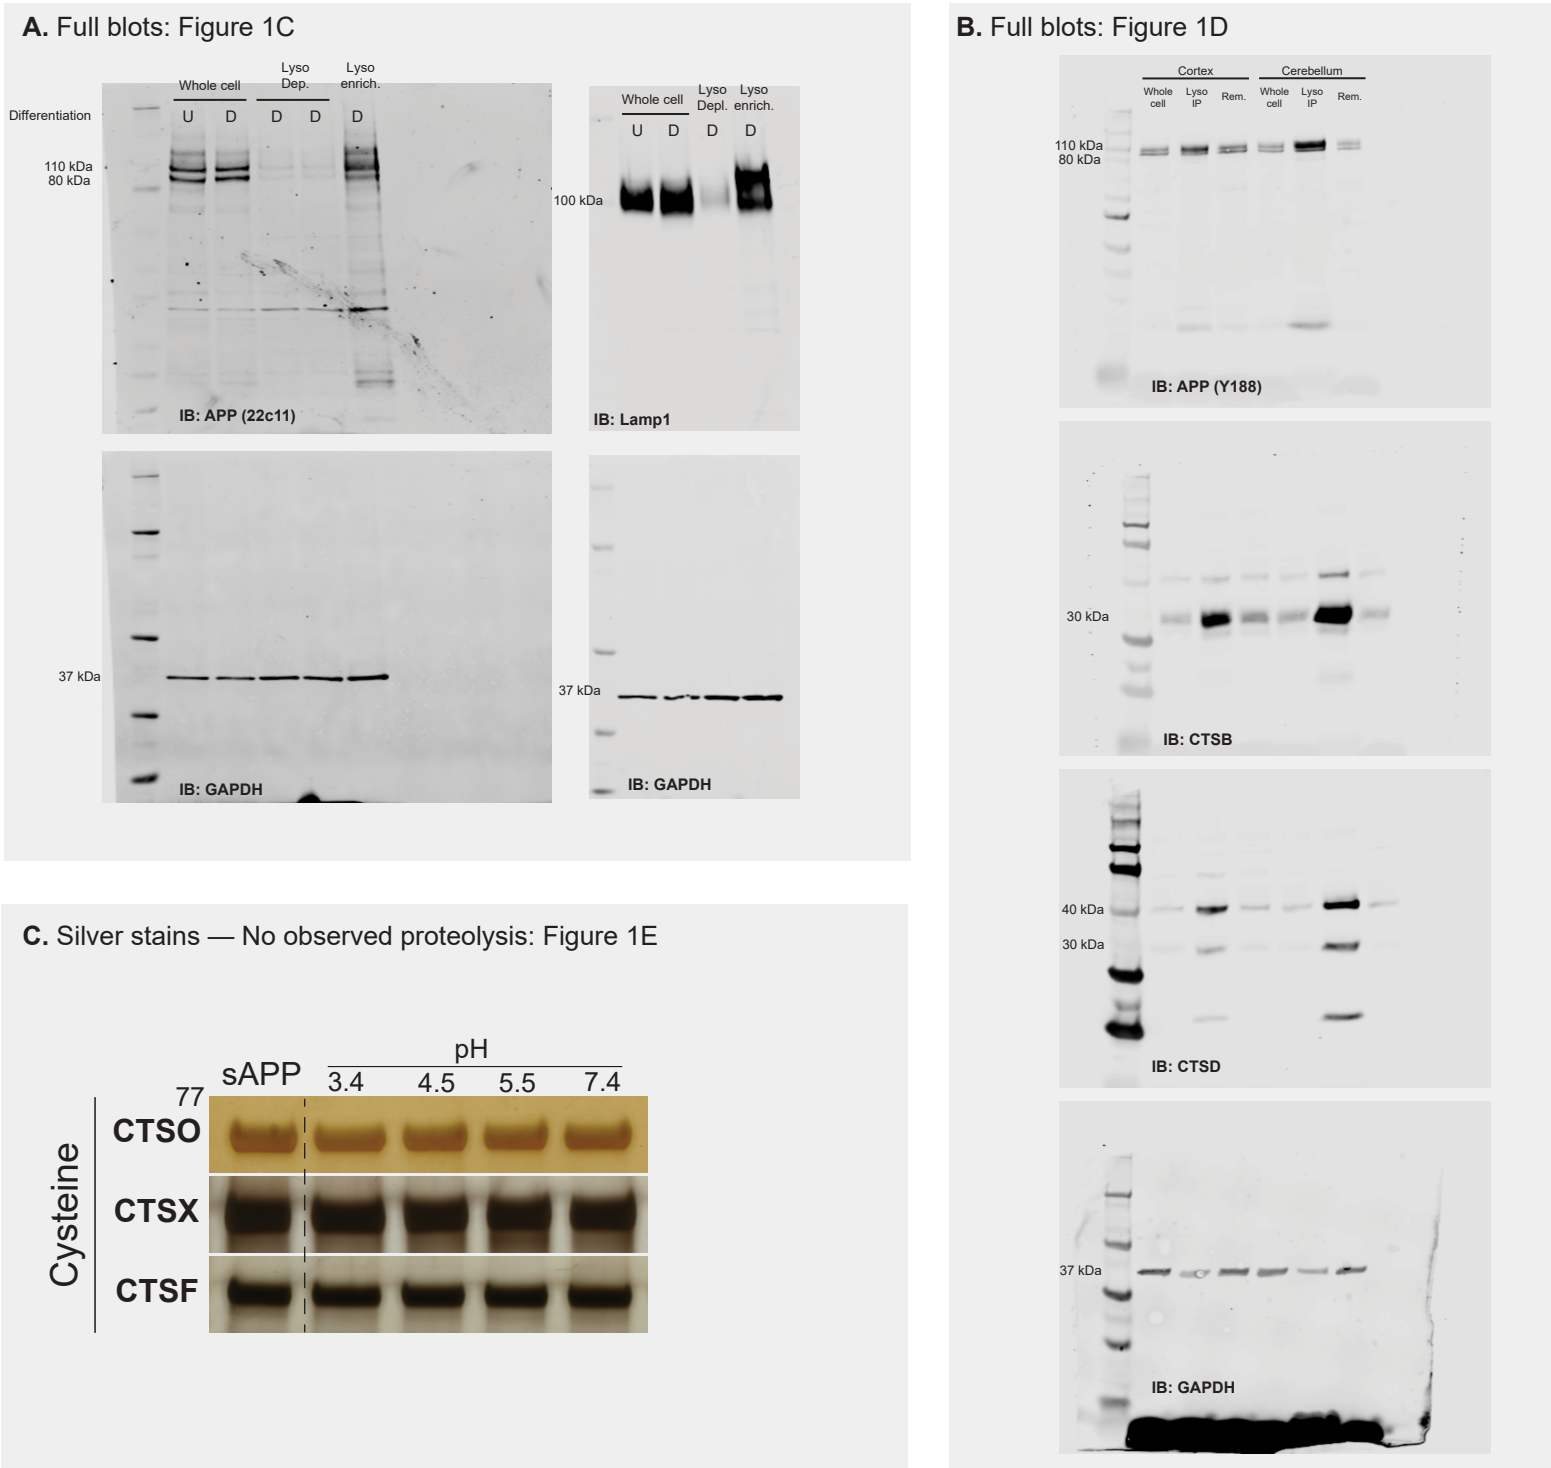

**Figure S3.** Full blots for Figure 3 and silver stains showing no observed proteolysis of APP by cathepsins O, X, and F. **(A)** SH-SY5Y cells were lysed and cellular contents were separated via density gradient centrifugation. Lysosome depleted ("Lyso depl.") and lysosome enriched ("Lyso enrich.") fractions were compared with whole cell samples on a Western Blot after staining with antibodies against APP, Lamp1, and GAPDH. **(B)** Cortex and cerebellum tissue was collected from LysoTag mice and neuronal lysosomes were collected via immunoprecipitation. Purified lysosomes ("Lyso IP") were blotted alongside the non-immunoprecipitated flow through ("Flow Thr.") and whole cell samples.

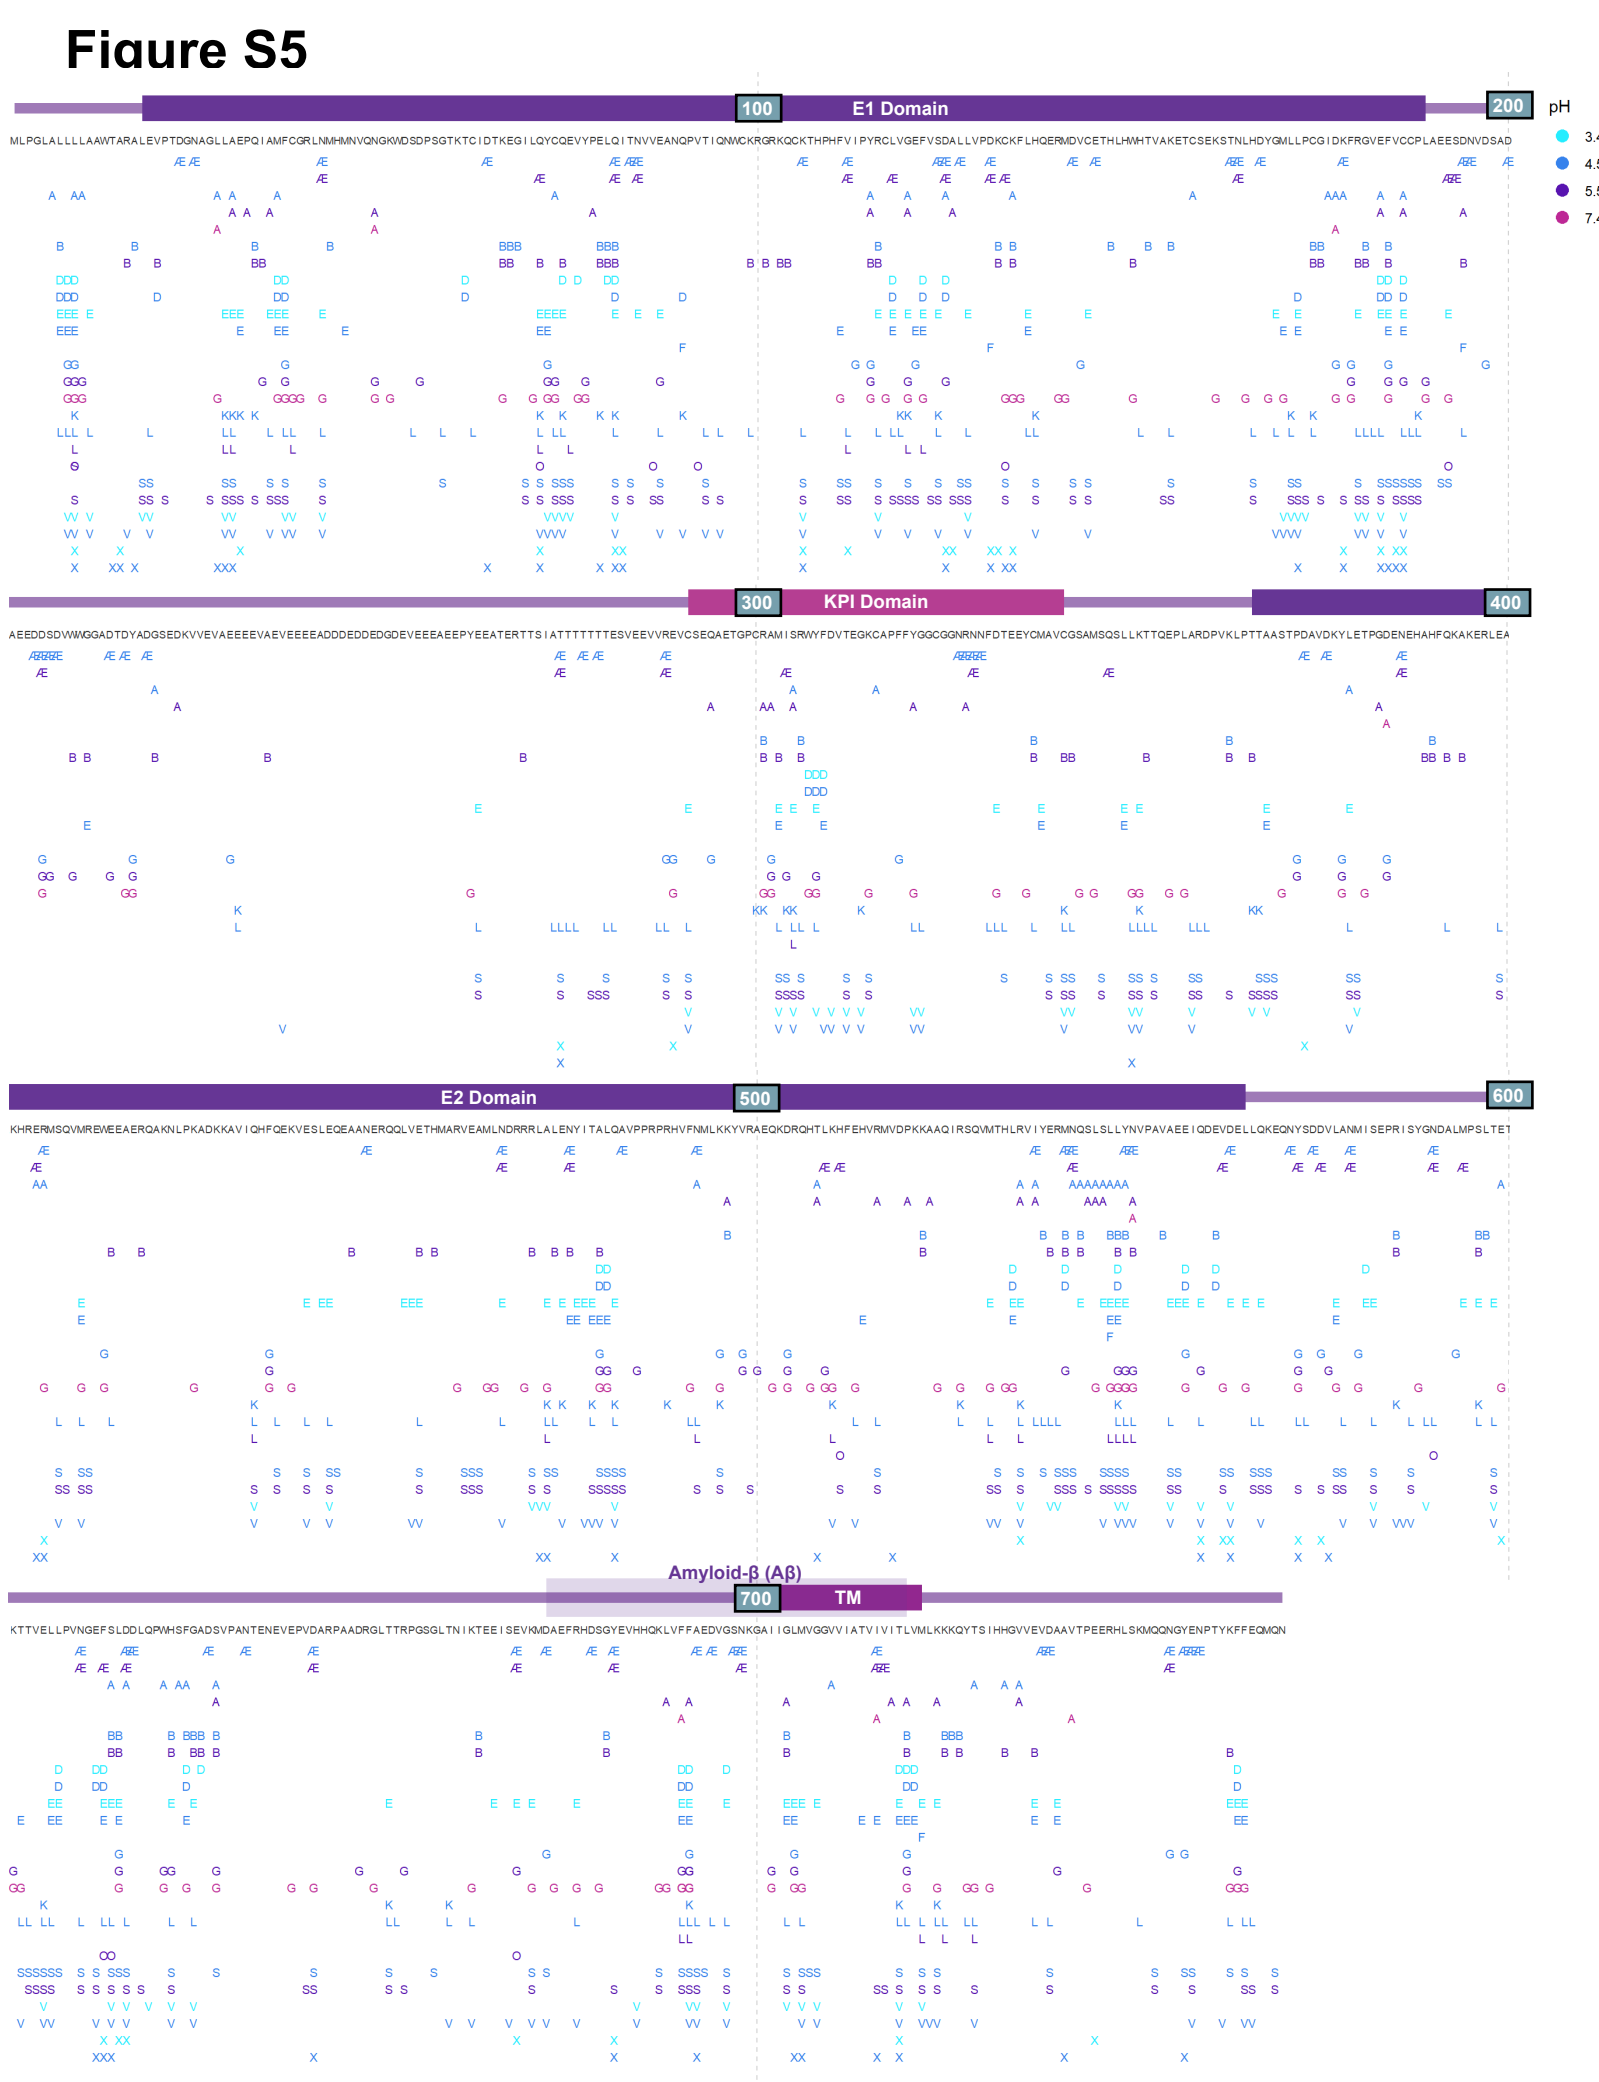

Figure S8

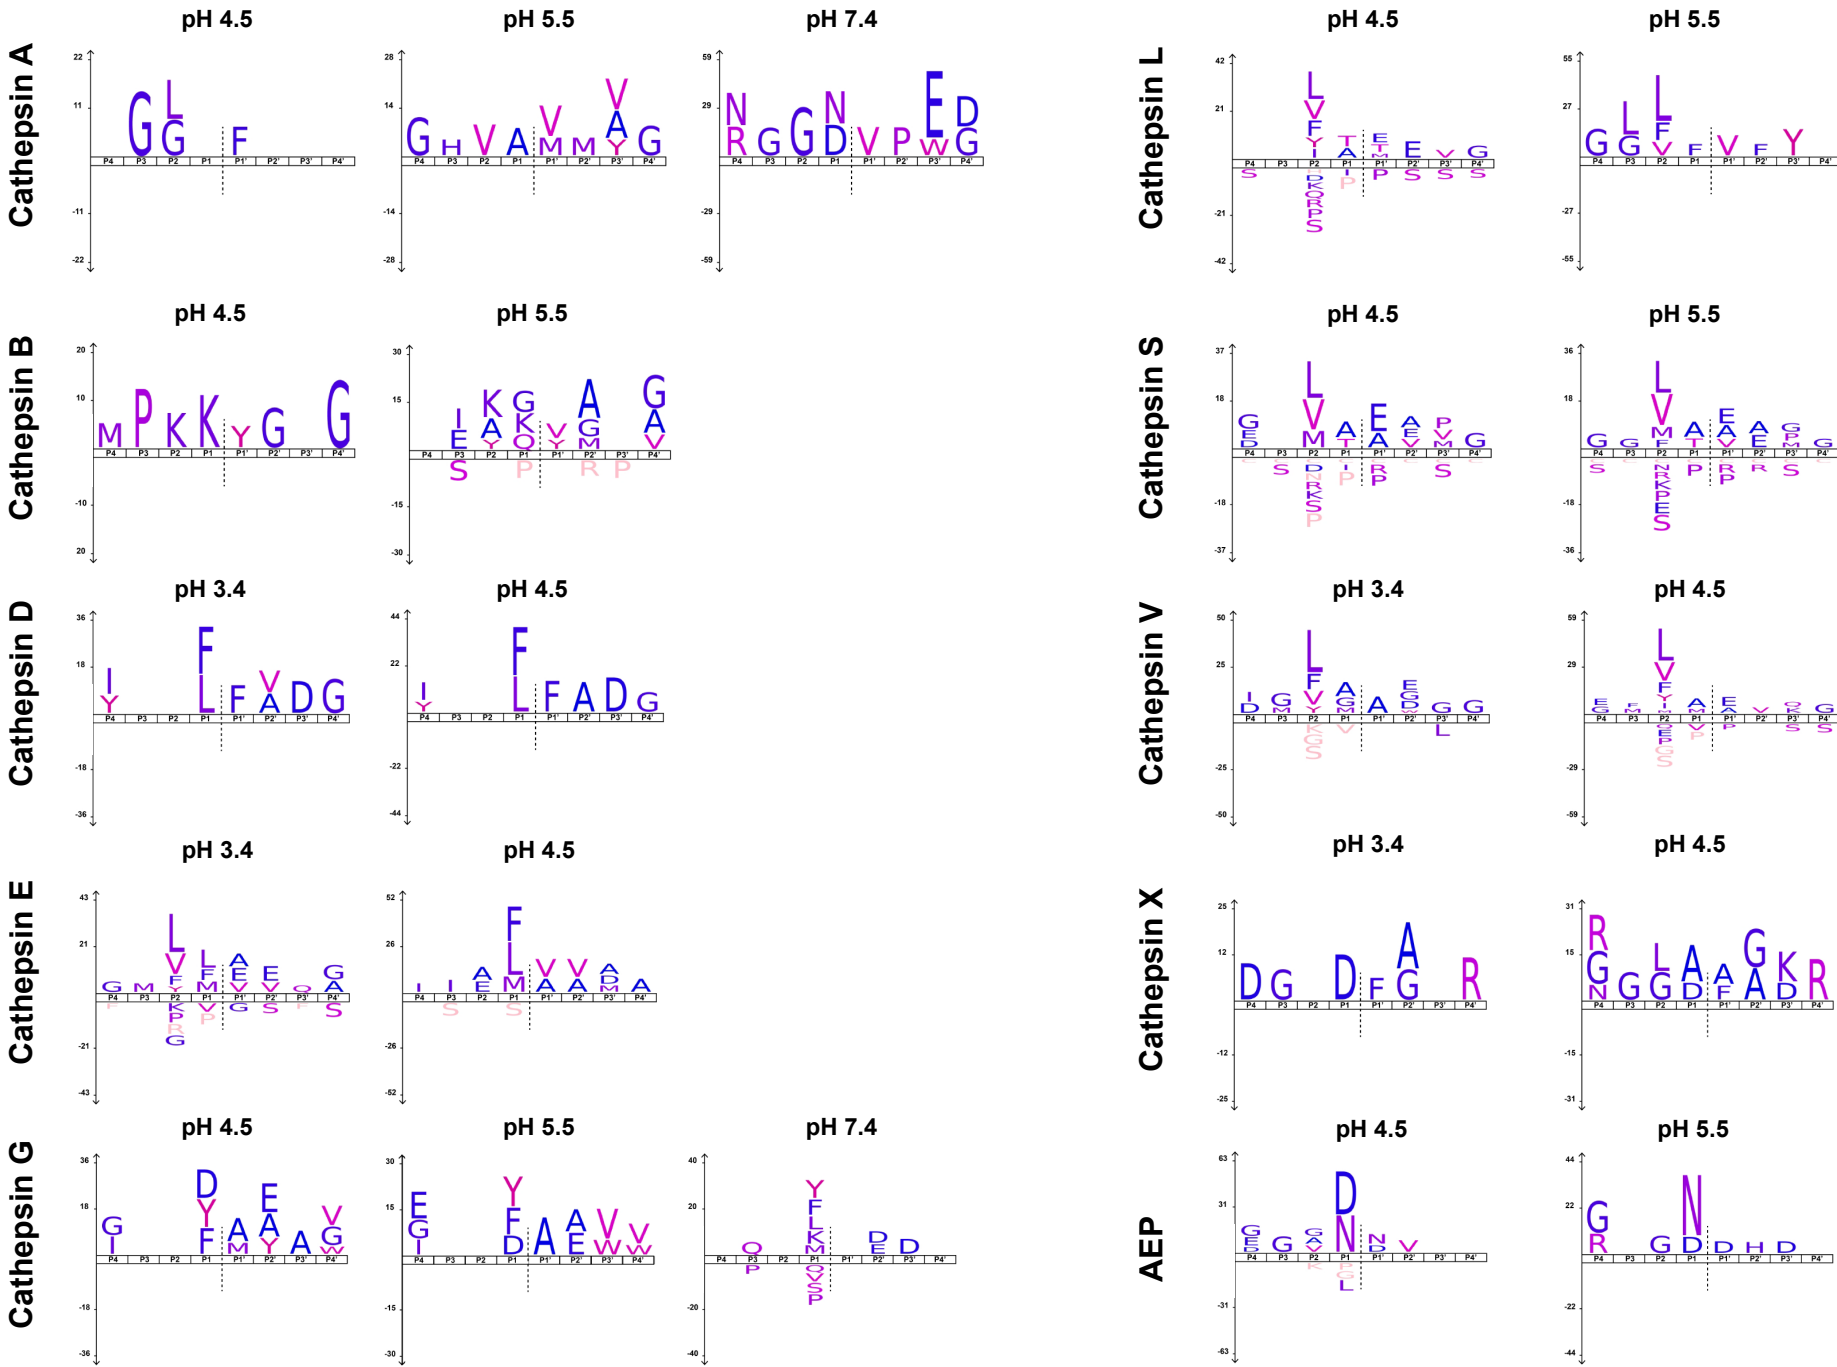

**Figure S8.** IceLogos of APP MSP-MS data by pH. IceLogos were generated for each enzyme at every pH tested using MSP-MS (APP data only).

Figure S9

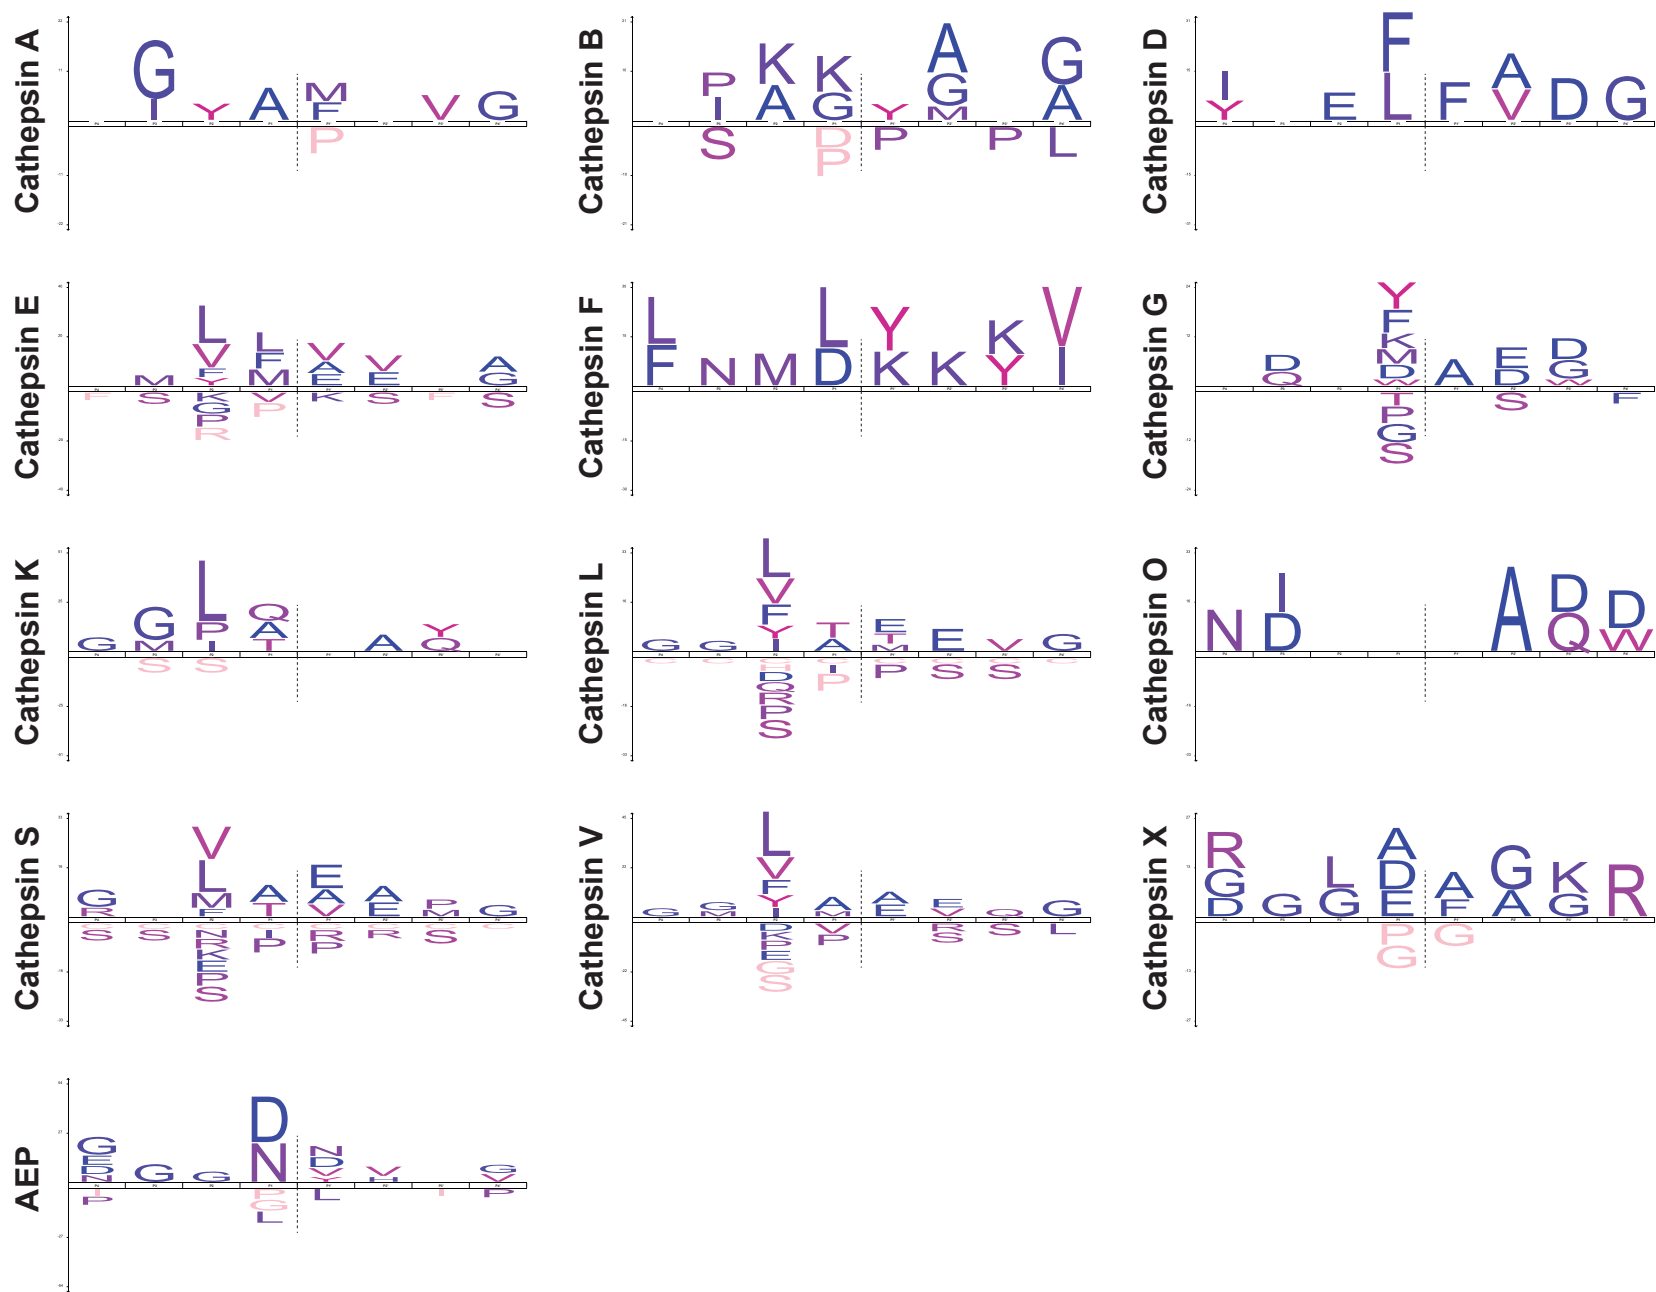

**Figure S9.** Combined IceLogos of current and previously published MSP-MS datasets. IceLogos were created from a combined MSP-MS dataset including proteolytic cleavage profiles of APP as well as tau,  $\alpha$ -synuclein, and TDP43.

Figure S6

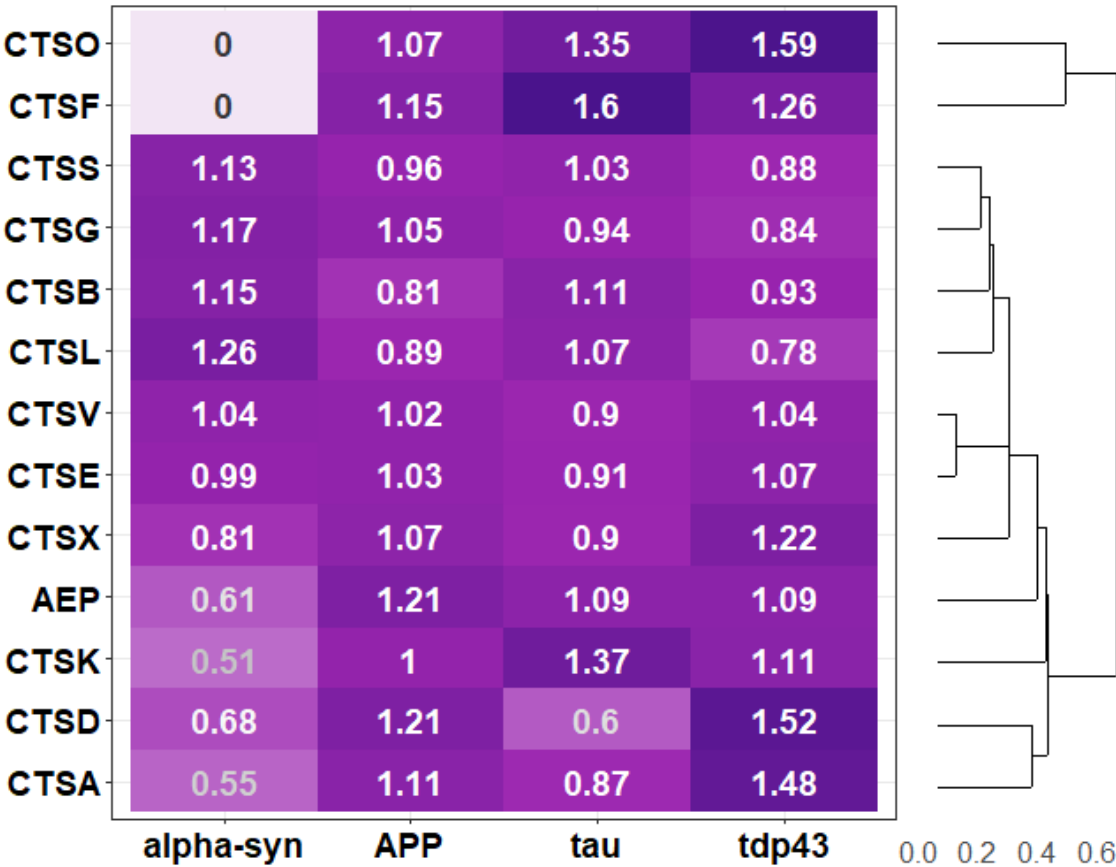

**Figure S6.** Heirarchical clustering analysis comparing the relative contributions of each enzyme in cleaving neurodegeneration-associated proteins. A heatmap and dendrogram displaying the relative contributions of each enzyme in cleaving  $\alpha$ -synuclein, APP, tau, and TDP43. Higher numbers and darker colors indicate a greater degree of cleavage by a particular enzyme. A dendrogram to the right of the heatmap indicates similarities between enzymes in their relative

# Figure S7

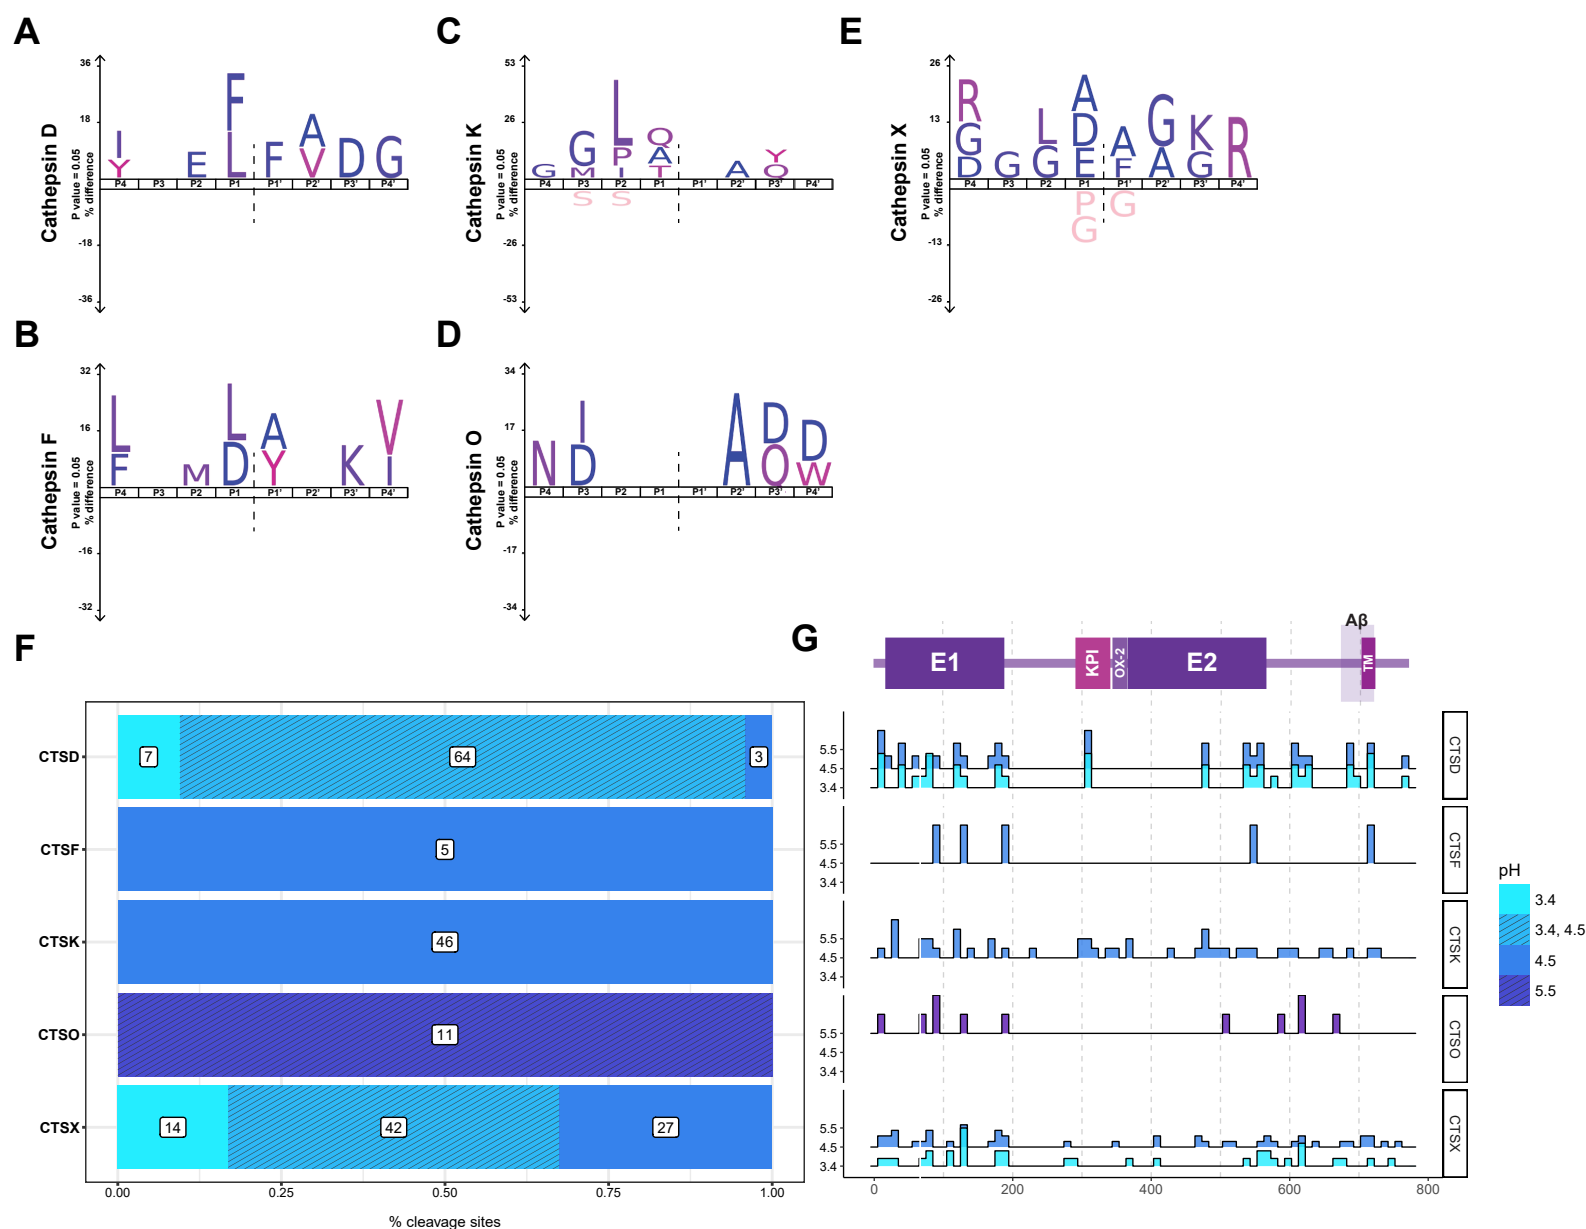

**Figure S7.** Supplemental IceLogos and cleavage profiles from Figure 3.

**(A-D)** IceLogos generated for the remaining enzymes from Figure 3 based on MSP-MS data. **(F)** Stacked barplots representing the number of cleavage sites tallied at each pH. **(G)** Graphical overview of the APP protein and a map of cleavage patterns across APP at varying pH levels. Dotted lines occur every 100 amino acids. E1, E2 = E1 and E2 domains, respectively. KPI = Kunitz Protease Inhibitor domain. TM = transmembrane. Histograms were generated at each experimental pH value and protease combination tested using MSP-MS. Bar heights indicate the relative number of cleavage sites for each condition (ie. the area under each plot = 100%).

Figure S10

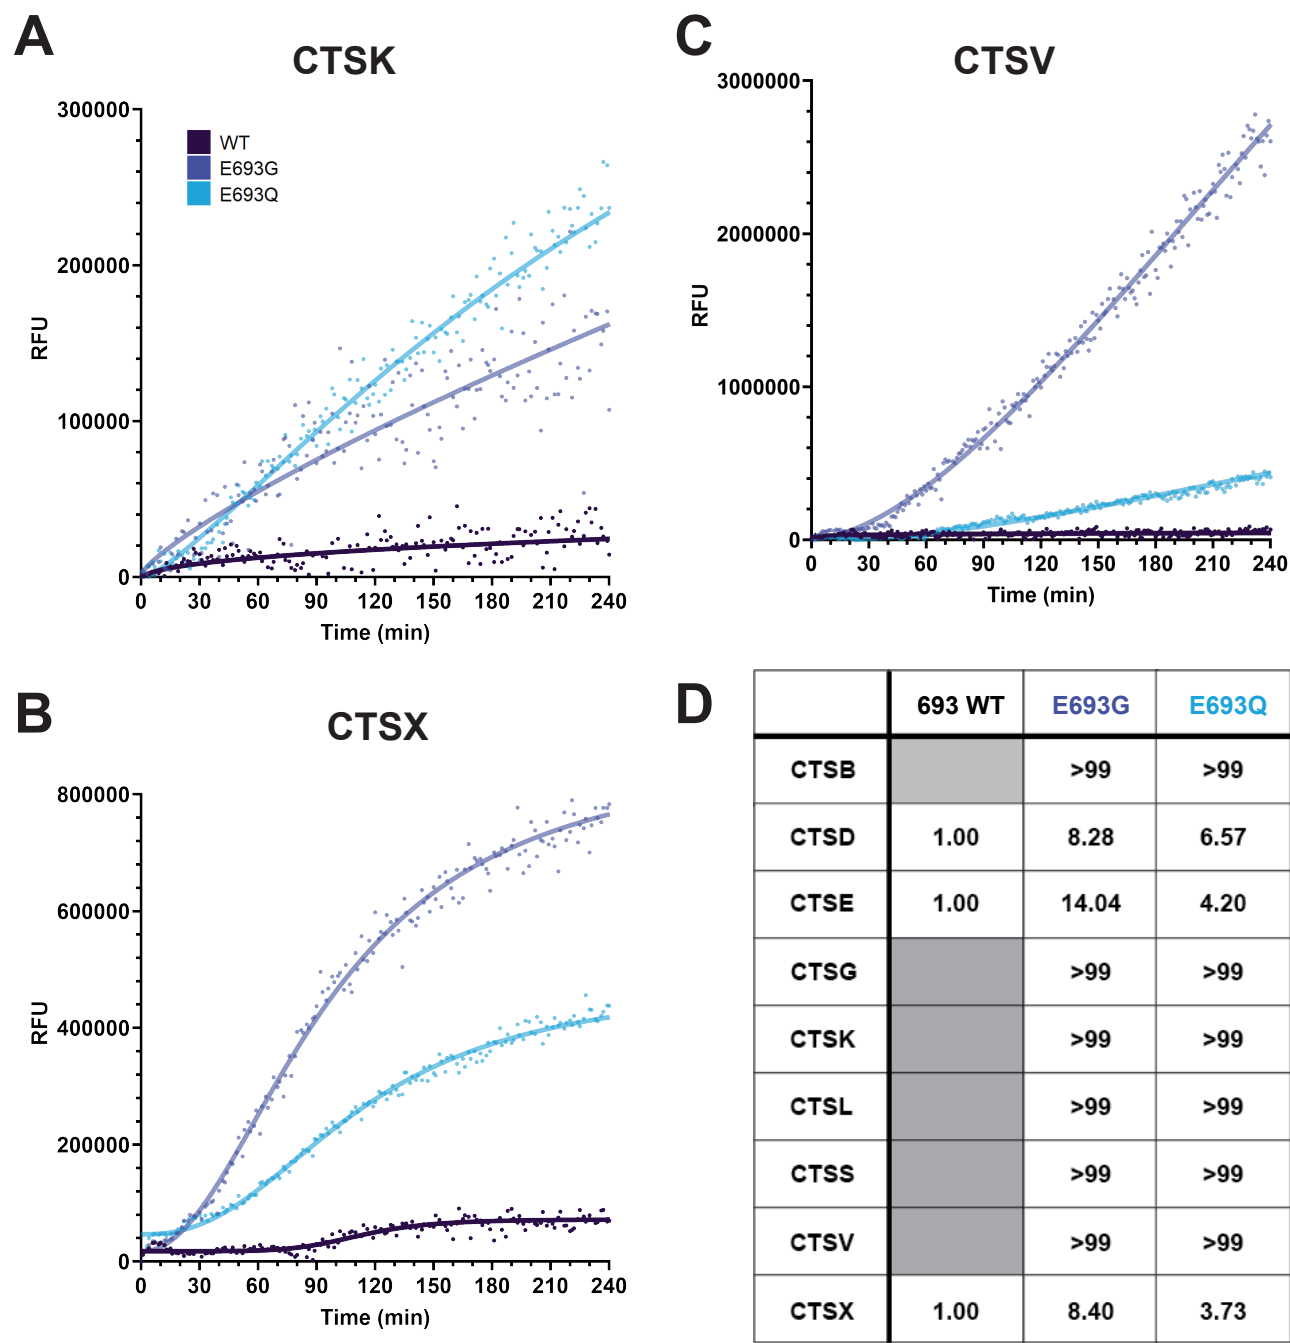

**Figure S10.** Supplemental fluorogenic peptide cleavage assays from Figure 4. **(A–C)** Activity profiles for supplemental enzymes in cleaving wildtype and E693 variant peptides. **(D)** Vmax values for each enzyme in cleaving E693, E693G, and E693Q fluorogenic peptides. Grey boxes denote instances in which no cleavage occurred.



Figure S11

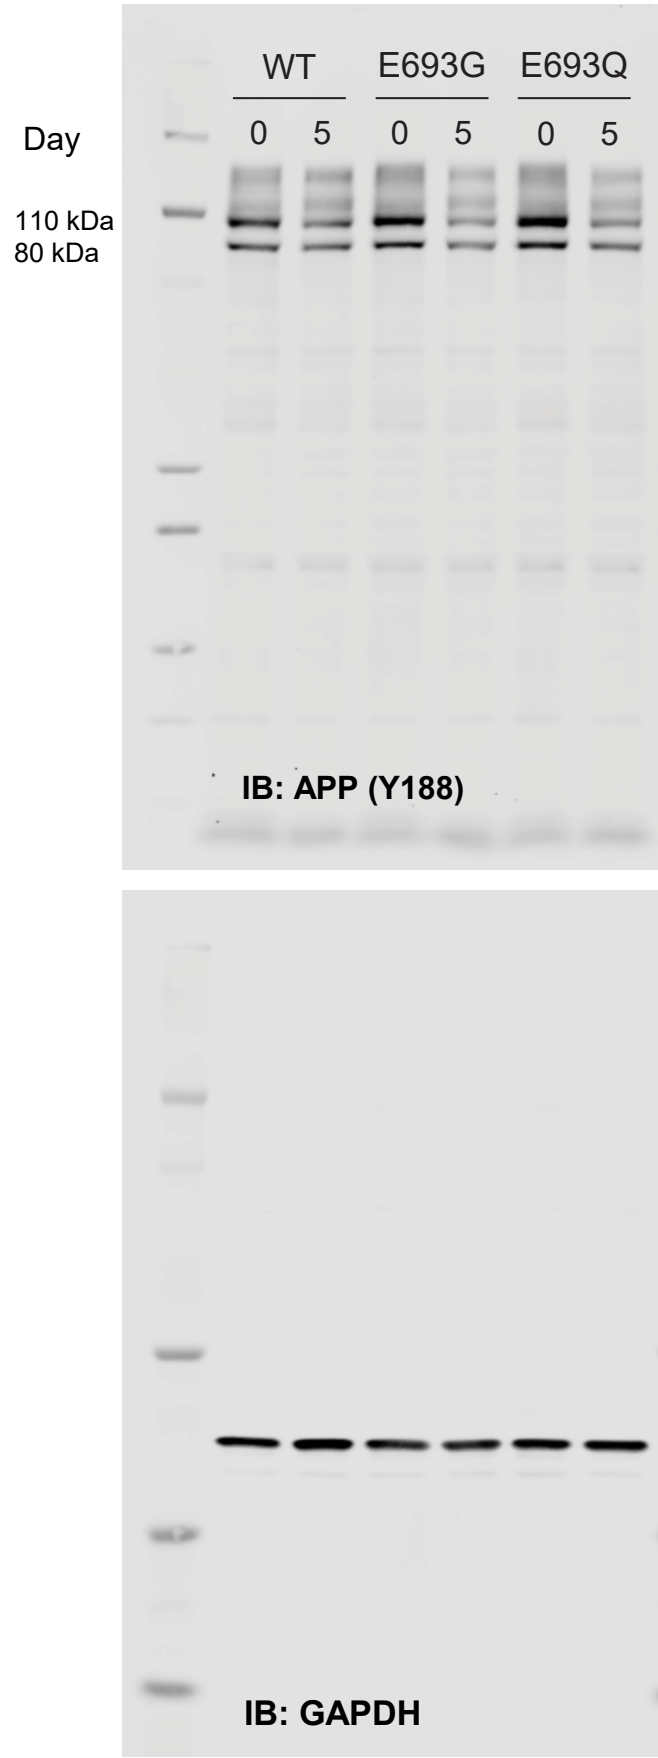

**Figure S11.** Full blots from Figure 4.  
Full Western blot images of wildtype and E693 variant SH-SY5Y lysates (Figure 4I).

**Figure S12**

$\alpha$ -

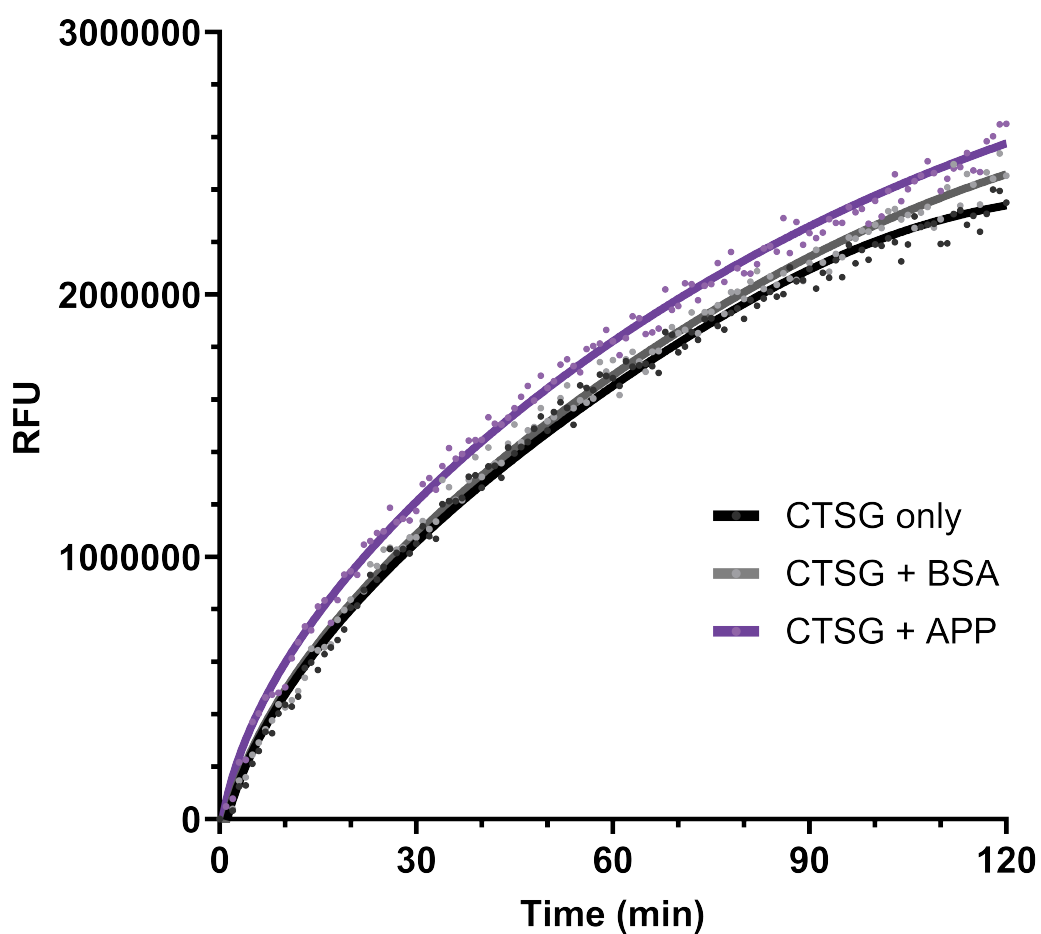

**Figure S12.** APP does not alter cleavage of a universal substrate by cathepsin G. Activity assay plotting cleavage of a fluorogenic universal protein substrate by cathepsin G in the presence of either BSA or APP. Cleavage activity was determined by quantifying fluorescence over time.

Figure S13

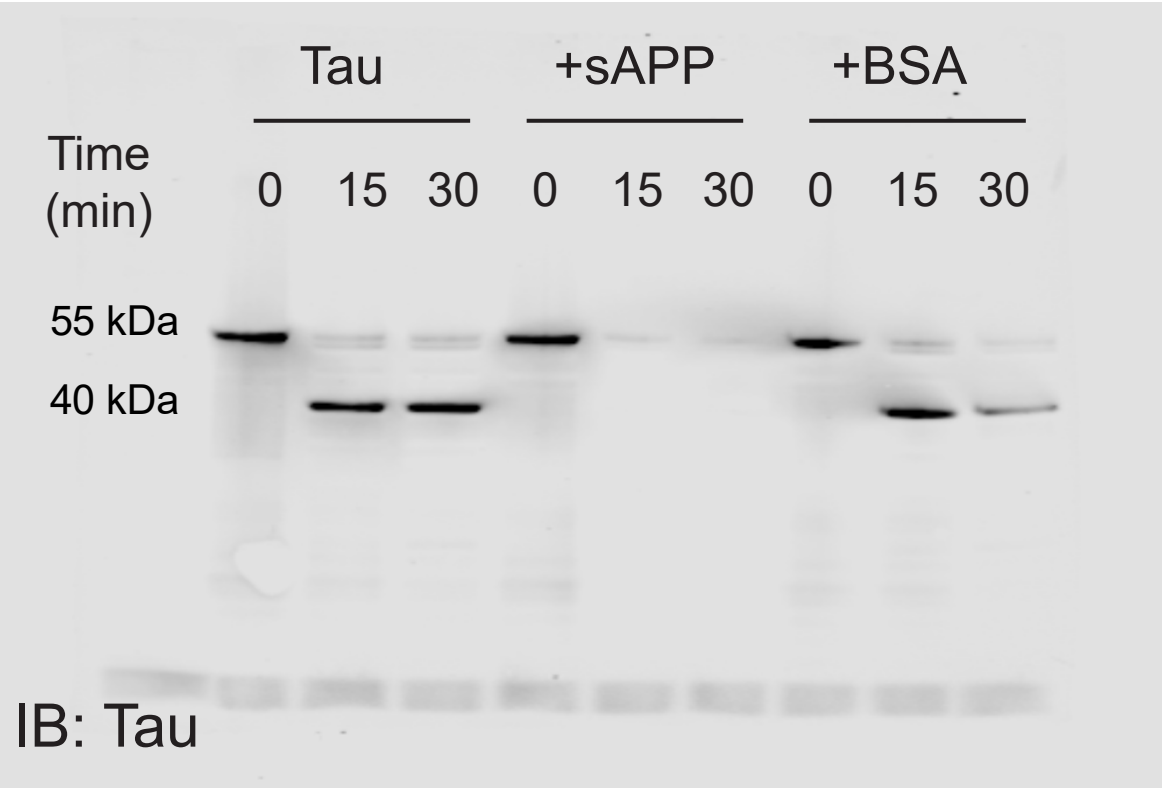

**Figure S13.** Full blot from Figure 5. Full Western blot from an *in vitro* cleavage assay of tau by cathepsin G in the presence of either sAPP or BSA (Figure 5D).
